# Supplementary material for: Multiomics Provide Insights into the Key Molecules and Pathways Involved in the Physiological Adaptation of Atlantic Salmon (Salmo salar) to Chemotherapeutic-Induced Oxidative Stress
Source: MDPI journal article supplement (doi:10.3390/antiox10121931), 2021-11-30
Supplement: s1 [file s1]

**A**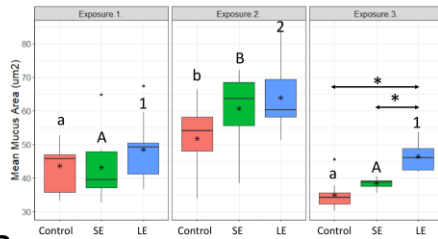**B**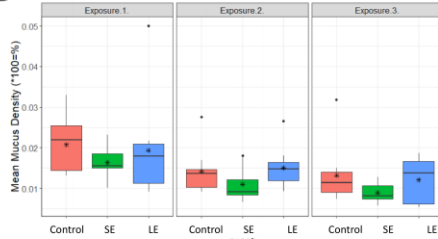**C**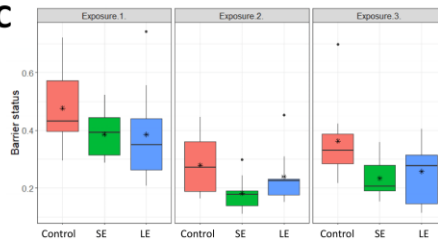**D**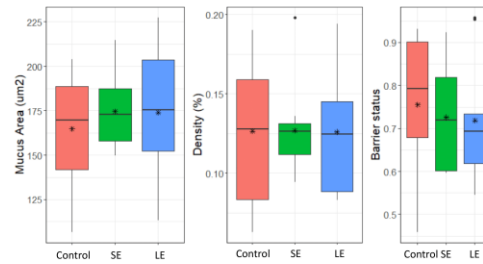

Supplementary Figure 1. Key mucosal morphometries of the gills and skin. (A–C) Gill samples were taken 24 h after each exposure, while (D) skin samples were only analysed after the 3rd exposure. Mean mucous area, density, and barrier status were measured using Quantidoc's mucosal mapping method. N = 9 fish per treatment group. Please refer to Fig. 1 for the statistical notations. SE, short exposure (15 min); LE, long exposure (30 min).
