# Supplementary material for: Multiomics Provide Insights into the Key Molecules and Pathways Involved in the Physiological Adaptation of Atlantic Salmon (Salmo salar) to Chemotherapeutic-Induced Oxidative Stress
Source: Antioxidants (Basel). 2021 Nov 30;10(12):1931. doi: 10.3390/antiox10121931 (PMC8750430; doi:10.3390/antiox10121931)
Supplement: Supplementary file 1 [file antioxidants-10-01931-s001.zip › Table S1. Metabolites.xlsx]

## Sheet: Annotation level 1
				DP	3.1139	43.7415	2.8996	7.20724	1.58585	17.9927	2.14052	1.92399	7.63779	4.50507	3.90595	6.52474	4.34588	9.66307	1.54154	6.08586	1.74867	3.44914	3.28592	1.10384	20.3399	7.90602	3.8138	20.4758	17.3862	5.46356	1.62291	6.22008	28.8133	2.90561	15.9854	1.49524	2.91492	2.8922	11.6618	2.99297	1.1323	11.4779
				Relative precision (%)	12.161	0.748275	14.8163	4.15812	4.98684	1.65831	11.4444	5.14126	3.47604	4.15725	5.07782	3.12271	5.64297	3.89745	8.15636	3.86001	14.0066	15.8902	3.47541	10.9126	2.71786	2.86914	2.32287	1.77254	1.98792	2.7	14.8757	3.36871	6.54887	4.67681	2.22756	5.34318	9.63416	2.51108	3.20025	11.9065	11.7169	3.48711
				LOD	117.912	887.832	30750	2953.92	1479.7	66.8924	41.0135	148.814	1022.92	912.276	114.224	118.199	1960.14	323.508	6330.41	17175.3	114.294	110.621	5055.59	441.21	5899.12	303.418	10823.8	7032.32	260.845	3000.76	747.152	59.7928	215.279	38.522	86.4332	3349.3	99.2456	40.0822	1223.73	252.966	1836.61	108.729
				RT [min]	1.322	1.633	3.552	1.496	1.382	1.395	1.897	3.429	7.849	1.316	4.622	1.236	4.335	5.113	2.199	4.064	1.157	1.657	2.482	1.382	2.861	5.836	5.646	1.567	4.879	2.956	6.695	1.238	7.925	1.906	1.284	6.222	4.568	1.97	2.594	4.663	1.964	4.625
				Molecular Weight	169.085	145.11	135.055	161.105	103.1	175.096	323.052	243.086	315.241	147.053	612.152	155.07	136.039	268.081	90.0317	131.095	146.106	134.021	149.051	165.046	123.032	219.111	165.079	115.063	217.132	129.043	376.138	125.015	515.292	264.105	119.058	204.09	181.074	324.036	112.027	244.07	117.079	152.033
				Formula	C7 H11 N3 O2	C7 H15 N O2	C5 H5 N5	C7 H15 N O3	C5 H13 N O	C6 H13 N3 O3	C9 H14 N3 O8 P	C9 H13 N3 O5	C17 H33 N O4	C5 H9 N O4	C20 H32 N6 O12 S2	C6 H9 N3 O2	C5 H4 N4 O	C10 H12 N4 O5	C3 H6 O3	C6 H13 N O2	C6 H14 N2 O2	C4 H6 O5	C5 H11 N O2 S	C5 H11 N O3 S	C6 H5 N O2	C9 H17 N O5	C9 H11 N O2	C5 H9 N O2	C10 H19 N O4	C5 H7 N O3	C17 H20 N4 O6	C2 H7 N O3 S	C26 H45 N O7 S	C12 H16 N4 O S	C4 H9 N O3	C11 H12 N2 O2	C9 H11 N O3	C9 H13 N2 O9 P	C4 H4 N2 O2	C9 H12 N2 O6	C5 H11 N O2	C5 H4 N4 O2
				Annotation level	1	1	1	1	1	1	1	1	1	1	1	1	1	1	1	1	1	1	1	1	1	1	1	1	1	1	1	1	1	1	1	1	1	1	1	1	1	1
				Name	3-Methylhistidine	Acetylcholine	Adenine	Carnitine	Choline	Citrulline	CMP	Cytidine	Decanoylcarnitine	Glutamic acid	Glutathione oxidized	Histidine	Hypoxanthine	Inosine	Lactic acid	Leucine	Lysine	Malic acid	Methionine	Methionine sulfoxide	Nicotinic acid	Pantothenic acid	Phenylalanine	Proline	Propionylcarnitine	Pyroglutamic acid	Riboflavin	Taurine	Taurocholic acid	Thiamine	Threonine	Tryptophan	Tyrosine	UMP	Uracil	Uridine	Valine	Xanthine
				Compound #	X0989	X0657	X0544	X0866	X0187	X1090	X2743	X1994	X2684	X0686	X3653	X0785	X0558	X2269	X0097	X0477	X0679	X0529	X0711	X0917	X0363	X1706	X0921	X0292	X1673	X0431	X3061	X0377	X3509	X2212	X0336	X1491	X1161	X2748	X0251	X2002	X0312	X0750
Sample #	Sample ID	Sample class		Unit	Area	Area	Area	Area	Area	Area	Area	Area	Area	Area	Area	Area	Area	Area	Area	Area	Area	Area	Area	Area	Area	Area	Area	Area	Area	Area	Area	Area	Area	Area	Area	Area	Area	Area	Area	Area	Area	Area
CS2784	A_P1	Control			52442.9	2.0294e+06	177017	479941	2.20912e+07	38701.1	1618.61	636499	9836.1	303336	282348	55869.9	887911	1.4084e+06	1.17738e+07	6.1875e+06	12171.3	24051.8	2.51657e+06	14121.8	14522	107270	1.12036e+07	2.74771e+06	114039	840199	27493.5	699014	5629.49	92434.6	226788	2.19155e+06	205624	391.064	41956.4	203437	169684	2924.57
CS2785	A_P2	Control			610.41	1.69235e+06	159099	434601	1.77126e+07	62342.9	1067.55	891970	10569.1	302489	220032	46193.9	1.15724e+06	2.02663e+06	1.18996e+07	5.95547e+06	7972.09	17600.3	2.62597e+06	11718.2	15018.5	140504	1.16522e+07	2.13558e+06	102370	825312	31086	676245	2028.09	89288.7	173333	2.02102e+06	186780	382.789	37396.6	230950	150245	2752.44
CS2786	A_P3	Control			46553.2	2.63081e+06	134347	545649	1.84794e+07	56557.3	904.765	775100	15865.8	301858	217948	52169.2	1.10905e+06	1.59175e+06	1.12323e+07	6.3997e+06	12517.7	17947.6	2.39255e+06	12417.4	35893.7	175875	1.11294e+07	3.05667e+06	143201	964319	26072.6	850674	5376.38	96315.9	341250	2.05969e+06	268908	365.253	51256.4	378973	210600	3623.12
CS2787	A_P4	Control			59371.5	1.77411e+06	330803	405892	1.88992e+07	42867.4	1292.65	707410	18201.1	367770	282513	60423.9	1.44107e+06	2.08289e+06	1.31787e+07	5.66304e+06	7265.59	24521.6	2.72474e+06	13908.8	34090.4	219228	1.06341e+07	1.73904e+06	160413	814739	35130.1	671313	5558.01	97895.8	233186	2.09775e+06	221726	374.505	57314.3	356224	151427	3780.22
CS2788	A_P5	Control			49945.1	1.98433e+06	96271.1	491976	1.94143e+07	46469	731.828	758323	12949.5	395377	199611	52932.4	1.24827e+06	1.69772e+06	1.47345e+07	269562	9904.82	16008.9	2.71405e+06	12362.3	43743.8	212129	1.17433e+07	2.66283e+06	205713	741073	25899	843156	2522.04	99845.7	301118	2.06256e+06	238855	372.422	56429.2	435635	190989	5535.96
CS2789	A_P6	Control			90118.6	3.58696e+06	237370	891674	1.84708e+07	41644.4	919.078	814471	27528.1	380517	258057	78320.3	1.37224e+06	1.7348e+06	1.39581e+07	6.91438e+06	8321.66	17212.2	2.21289e+06	16215	40034.4	254919	9.20939e+06	1.78615e+06	263481	1.14026e+06	42336.8	849338	1.46032e+06	81396.7	189002	2.22041e+06	145370	375.822	67786.9	411635	185914	5508.69
CS2790	B_P1	SE			52272.8	4.58086e+06	98636	543898	1.75903e+07	79571.4	1093.26	689001	25582	406049	305959	47660.2	2.13053e+06	4.88261e+06	1.426e+07	6.09496e+06	9201.77	27003.1	2.36061e+06	15774	11156.3	223008	1.12109e+07	2.24062e+06	163608	1.27105e+06	47983.5	1.12594e+06	3053.4	110576	242648	2.02326e+06	246759	372.882	56848.4	143958	174561	4279.06
CS2791	B_P2	SE			35601.6	2.65595e+06	127630	398056	1.91478e+07	67631.4	895.291	745741	18772.4	510732	275387	59453.1	2.29777e+06	4.96396e+06	1.76712e+07	5.79198e+06	6506.32	34867.2	2.19221e+06	13944.4	12892.3	293204	1.02741e+07	1.99628e+06	232463	954042	36169.3	1.01691e+06	3801.22	112664	158739	1.94351e+06	167621	356.386	93259.8	174076	160779	6790.14
CS2792	B_P3	SE			85774.7	1.88094e+06	170716	376929	1.83913e+07	102035	795.888	778281	21601.3	327163	300028	61653.9	1.97398e+06	4.69284e+06	1.25064e+07	5.30926e+06	8069.72	24105.3	2.09822e+06	17960	12481.3	192978	9.90286e+06	1.72227e+06	116808	1.10078e+06	37865	700716	2162.73	98446.8	185494	1.6145e+06	203425	351.453	56986.6	172188	171515	2973.61
CS2793	B_P4	SE			48980.2	2.97441e+06	270675	465547	1.56189e+07	43242	909.376	736094	23656.3	335831	316660	60722.1	2.03846e+06	4.77026e+06	1.24785e+07	5.46917e+06	9062.55	30145.8	2.25103e+06	11685.2	23613.2	177271	8.85147e+06	2.39645e+06	190708	1.11826e+06	29690.2	957147	1.82187e+06	85015.4	344372	1.98675e+06	144511	362.306	86946.2	199146	169864	8832.14
CS2794	B_P5	SE			76598.3	2.10147e+06	189019	674113	1.8456e+07	79312.8	1345.83	629288	14469.1	446446	293132	74906.5	1.68783e+06	4.48424e+06	1.24186e+07	6.41626e+06	10471.6	82578	2.71276e+06	13478.9	21924.7	192913	1.15001e+07	5.17864e+06	136579	888943	28618	963913	25844.5	81470.2	245124	2.02905e+06	191890	377.15	35516.9	124005	231093	3044.04
CS2795	B_P6	SE			52302.3	2.20718e+06	174081	578909	1.87429e+07	69179.8	974.611	726266	18699.1	412567	264565	53840.3	2.08108e+06	5.25938e+06	1.2995e+07	5.98503e+06	7897.77	23249.6	2.37495e+06	11508.9	24506.5	189588	1.15503e+07	2.25773e+06	224214	974201	26525.4	915484	10088.5	115568	241014	2.10477e+06	200750	383.497	109185	267948	189242	3561.77
CS2796	C_P1	LE			38202.6	2.43766e+06	381399	498889	1.81892e+07	61410.6	1664.08	734900	23192.3	284619	298209	61107.9	1.52096e+06	4.64996e+06	1.28933e+07	7.14215e+06	11540.6	45615.7	2.88068e+06	13918.7	12404.3	138898	1.16535e+07	2.81881e+06	94283.6	1.08573e+06	32017.8	583285	3554.14	90288.4	279422	2.27595e+06	365275	454.81	38485.7	172336	251390	2513.88
CS2797	C_P2	LE			40531.6	4.14808e+06	170724	530574	1.99317e+07	56197.4	762.399	658146	18058	465366	276138	60900.7	1.87383e+06	4.5425e+06	1.32024e+07	7.29992e+06	10303.2	25867.6	2.45997e+06	13543.5	34749.8	212010	9.8326e+06	5.18392e+06	207770	986436	18954.6	1.15568e+06	2899.08	126779	394303	1.81261e+06	219996	392.165	78267.8	230744	184796	3626.95
CS2798	C_P3	LE			43669.7	2.0178e+06	163554	407396	1.5606e+07	47388	750.808	703994	16617.1	246142	239045	39693.3	1.31334e+06	3.78801e+06	9.66164e+06	6.8479e+06	9245.31	18809	2.676e+06	14147.7	20988.2	129841	1.2111e+07	2.33077e+06	98010.9	888373	32335.5	698605	2251.34	98490.1	365372	2.36606e+06	341331	347.278	31235.5	220181	209479	2139.16
CS2799	C_P4	LE			62748.4	3.37419e+06	103406	502102	1.81886e+07	98265.5	1069.49	791740	19310.1	336142	291793	43019.9	1.63594e+06	4.00334e+06	1.24454e+07	6.28599e+06	5131.02	28630.9	1.88829e+06	13253.1	4562.04	206565	1.13987e+07	2.1069e+06	150721	1.16084e+06	38074.7	679937	5237.14	80336	107406	2.0731e+06	188063	384.001	42796.2	183079	188400	4054.78
CS2800	C_P5	LE			80587.7	2.33105e+06	55951.1	660643	2.01015e+07	41963.4	827.272	798398	20401.5	289161	317790	57783.9	1.17217e+06	2.68777e+06	1.42703e+07	7.20897e+06	11568.4	12030.4	2.41128e+06	13865.7	12763.2	228586	9.48616e+06	3.63857e+06	204785	1.27291e+06	22202.3	730614	8.23324e+06	100319	466955	2.23523e+06	126041	417.581	39292.2	245363	199381	3948.24
CS2801	C_P6	LE			76874.2	4.51423e+06	162567	1.0138e+06	1.76404e+07	70397.1	1112.94	903677	29324.5	409968	480993	90531.5	1.79345e+06	3.32042e+06	1.40681e+07	6.15578e+06	16368.4	25037	1.86466e+06	14732.1	5583.48	251731	9.60466e+06	2.38896e+06	328292	1.2494e+06	20721.7	1.14331e+06	1.30504e+07	74190.3	153550	2.19114e+06	144264	435.595	70932.4	279205	187007	6755.19

## Sheet: Annotation level 2a
				DP	2.57566	3.8244	2.76694	4.58847	7.11231	7.37348	1.94164	9.63192	3.14753	6.93786	15.9009	60.7636	9.38114	4.63819	2.2965	2.75721	7.00095	10.899	3.79563	2.43252	1.94673	4.62305	2.33271
				Relative precision (%)	7.56616	5.58082	5.29823	6.82496	5.49805	4.22505	10.3914	4.39598	8.51552	5.87928	2.10489	3.11358	17.3212	4.26213	4.60163	11.6974	4.68965	6.72003	6.1856	6.61623	9.90693	3.89765	13.1739
				LOD	126.539	250.11	58.8125	217.43	55.9906	52.1535	419.333	367.922	275.644	326.698	6617.06	1503.26	89.3544	857.771	181.181	68.1005	191.165	512.041	3547.86	9532.86	417.863	152.886	218.195
				RT [min]	1.631	4.452	4.836	1.316	1.454	1.891	1.225	1.625	5.198	5.615	1.574	1.677	1.219	1.313	1.271	1.278	5.171	1.716	6.257	4.616	1.318	1.219	1.323
				Molecular Weight	174.016	227.091	165.065	150.053	158.044	146.021	132.054	89.0477	260.083	231.147	131.07	113.059	240.024	132.042	146.069	75.032	283.092	192.027	130.063	122.048	167.982	105.043	182.079
				Formula	C6 H6 O6	C9 H13 N3 O4	C6 H7 N5 O	C5 H10 O5	C4 H6 N4 O3	C5 H6 O5	C4 H8 N2 O3	C3 H7 N O2	C10 H16 N2 O4 S	C11 H21 N O4	C4 H9 N3 O2	C4 H7 N3 O	C6 H12 N2 O4 S2	C5 H8 O4	C5 H10 N2 O3	C2 H5 N O2	C10 H13 N5 O5	C6 H8 O7	C6 H10 O3	C6 H6 N2 O	C3 H5 O6 P	C3 H7 N O3	C6 H14 O6
				Annotation level	2a	2a	2a	2a	2a	2a	2a	2a	2a	2a	2a	2a	2a	2a	2a	2a	2a	2a	2a	2a	2a	2a	2a
				Name	(Z)-Aconitic Acid	2'-Deoxycytidine	7-Methylguanine	aldopentose	Allantoin	alpha-Ketoglutaric acid	Asparagine	Beta-alanine	Biotinsulfoxide	butyrylcarnitine	Creatine	Creatinine	Cystine	Gluraic acid/ethylmalonic acid	Glutamine	Glycine	Guanosine	Isocitric acid	Ketoleucine	Nicotinamide	Phosphoenolpyruvic acid	Serine	Sorbitol/Manitol
				Compound #	X1067	X1816	X0919	X0723	X0826	X0665	X0496	X0086	X2179	X1875	X0472	X0266	X1952	X0494	X0669	X0022	X2392	X1313	X0462	X0356	X0963	X0204	X1180
Sample #	Sample ID	Sample class		Unit	Area	Area	Area	Area	Area	Area	Area	Area	Area	Area	Area	Area	Area	Area	Area	Area	Area	Area	Area	Area	Area	Area	Area
CS2784	A_P1	Control			52286.8	12528.2	29281.3	198240	5632.79	2135.49	2684.75	78885.3	1251.8	25577.9	2.62825e+06	236209	945.989	276054	1.22177e+06	5809.1	238248	1792.09	259088	960646	3174.43	28227.2	26390.6
CS2785	A_P2	Control			94663	15807.8	29515.2	124988	5776.93	2549.47	2887.46	63920.3	1476.71	17126.6	2.15505e+06	213339	870.734	294467	1.11873e+06	3680.01	210204	6687.68	182593	883545	3056.53	40809.6	2610.74
CS2786	A_P3	Control			80870.6	16196.3	30206.9	157680	6891.79	2406.87	3120.51	65220	1666.05	29681	2.97233e+06	231950	883.338	254930	1.243e+06	8053.17	222597	1879.01	210154	1.21227e+06	3193.21	35804.5	33301.8
CS2787	A_P4	Control			66657.8	19588.4	34279.7	183632	6773.83	1542.32	1644.44	72064.2	1706.1	26939.2	1.80648e+06	223844	942.301	255681	1.05625e+06	5696.82	335473	2398.49	117605	1.16129e+06	2683.77	30425.5	28110.9
CS2788	A_P5	Control			108244	16959.6	28307.2	108245	7432.96	3764.67	1816.4	72590.3	1422.56	39609.7	2.57921e+06	240194	847.568	251474	1.04038e+06	6671.61	304928	2832.48	177405	1.0991e+06	2895.4	33936.5	32102.1
CS2789	A_P6	Control			58605.6	19161.9	36905.3	97423.7	9278.09	4209.31	3643.63	69097.6	1691.2	55994.4	1.84725e+06	225338	948.489	254606	1.20833e+06	5489.83	297908	2033.24	176053	1.41921e+06	2768.92	33344.6	45876.2
CS2790	B_P1	SE			98597.2	16675.2	27829.4	62160.5	7775.33	3533.32	3298.04	79277.2	3345.42	25673.2	2.17395e+06	193429	1119.14	301362	1.37128e+06	6505.94	156012	5364.79	194994	992431	3455.5	37494.9	16398.2
CS2791	B_P2	SE			104817	21332.7	32983	132867	6949.14	6026.7	2715.59	79530.8	3028.76	27592.3	1.92896e+06	205686	1006.02	339665	1.27714e+06	4771.41	191097	6228.17	181332	1.1115e+06	3318.81	32625.2	22115.4
CS2792	B_P3	SE			71058.8	12479	35015.4	64897.6	6983.78	2380.44	2999.8	76908.9	2504.19	31158.2	1.81514e+06	1.81514e+06	872.575	359132	1.23096e+06	4568.8	144988	2786.22	154216	1.0062e+06	3377.32	44874.4	24290.5
CS2793	B_P4	SE			63393.5	13348.5	38519.5	107929	18690.4	2418.27	2656.86	69201	2983.51	23357.2	2.26805e+06	174188	948.45	257555	1.27968e+06	8862.43	164428	3643.64	123213	1.07402e+06	3091.35	32324.3	31482
CS2794	B_P5	SE			97154.8	10893.5	24830.8	190309	6211.98	3361.91	2937.82	212810	3496.4	30562.1	4.82979e+06	354421	826.46	300753	1.2001e+06	6324.73	153583	2673.61	243595	1.20087e+06	5689.78	31953.7	31625
CS2795	B_P6	SE			84167.6	13497.3	40610.3	136946	8376.91	3276.48	2871.17	58382.1	2824.34	29177.8	2.22006e+06	156702	914.693	81488.2	1.14686e+06	5972.78	169938	2366.04	125525	1.22771e+06	3121.89	36592.2	30749.7
CS2796	C_P1	LE			60735.7	13964.7	32413	214544	8988.51	2099.18	2324.06	66359	2533.54	9906.67	2.54643e+06	190363	843.929	313961	1.33001e+06	6304.89	125268	2871.29	232987	973076	3033.06	45662.2	30186
CS2797	C_P2	LE			83595.2	9321.72	28907.6	139146	5606.9	3212.84	2608.06	57875.9	2183.96	19282.2	4.71306e+06	153437	895.67	292037	1.53047e+06	9108.22	144479	4700.82	156015	1.29489e+06	3012.89	34502.8	15457.9
CS2798	C_P3	LE			79066.1	13126.8	29662.7	175471	7088.11	2620.45	2631.11	59705.8	2314.55	20360.7	2.28464e+06	178410	2034.74	275318	1.02937e+06	9235.57	142592	1419.18	231776	1.27361e+06	2910.31	47723.9	15026.2
CS2799	C_P4	LE			84443.4	17143	35782.1	154734	6545.59	4698.18	2590.56	94273.3	2636.22	21868.5	1.97548e+06	190579	7455.72	332338	1.15692e+06	3228.54	139377	3512.95	220339	654856	3325.09	33943.8	26622.6
CS2800	C_P5	LE			84669.7	17055.7	29605	82040	13759.8	6005.44	3269.82	65906.8	1612.55	55182.3	3.42635e+06	189055	928.294	302837	1.47818e+06	12492	145736	9478.03	278084	1.11749e+06	3814.74	21393.8	20123.7
CS2801	C_P6	LE			95722.3	22255.6	43615.3	226094	7702.73	3130.72	4169.05	149259	2046.2	49806.8	2.44255e+06	282445	964.744	284514	1.26684e+06	4507.14	166086	1871.25	160351	918174	3201.15	40254.1	26011.5

## Sheet: Annotation level 2b
				DP	2.1458	6.0901	2.01536	3.63055	5.73554	17.1621	3.58572	2.61826	5.89013	1.72587	9.40207	2.41046	2.34528	2.4838	4.63151	1.60898	3.81649	1.8811	3.48548	5.46269	4.04619	7.47521	1.35429	0.959575	5.18575	3.76799	5.66731	3.26541	5.08744	1.34986	15.5875	14.124	1.19766	7.34466	0.47157	3.97867	4.58806	3.4133	5.44247	2.46958	4.87545	47.0776	8.26325	2.62101	10.9637
				Relative precision (%)	4.58353	3.97766	5.05503	3.23681	7.18181	1.43842	5.91128	6.65343	3.95005	5.02414	4.62415	3.89404	15.522	2.52806	4.3976	9.04359	7.0316	16.8861	1.75548	3.49714	5.12108	3.97309	7.96802	7.49659	5.54036	7.40632	4.27211	5.30314	9.69116	18.5894	2.1783	4.25153	10.7823	2.16681	19.6329	5.50468	5.90256	10.3801	5.63924	9.2541	4.81256	1.04321	2.38063	5.03858	3.47443
				LOD	3976.29	327.193	261.83	156.718	743.427	1181.67	460.153	834.37	80.8574	257.767	391.822	551.913	1391.94	553.226	1226.51	651.877	1701.86	11616.9	53539.3	301.482	8052.1	48.7728	933.574	325.954	89.4618	562.551	520.701	5280.12	555.807	84357.3	2059.94	1888.79	11061.5	6320.52	94.4513	264.399	131.643	420.236	109.187	139.968	62.423	12996.7	988.35	74.946	50.5092
				RT [min]	1.529	7.198	6.233	2.82	1.434	4.55	2.086	5.329	2.064	6.233	6.703	6.224	7.142	6.233	2.081	1.911	7.803	4.085	5.577	4.867	1.58	1.645	6.243	6.225	5.101	2.393	3.476	6.009	6.326	7.61	2.432	6.987	2.292	1.462	1.421	5.074	4.61	4.757	1.738	5.026	1.688	2.656	6.01	1.845	2.364
				Molecular Weight	75.0684	158.085	158.085	149.07	108.069	164.048	140.047	198.101	172.037	156.069	179.058	117.058	145.053	145.053	168.042	143.041	164.084	99.0684	99.0684	125.059	131.095	167.025	159.068	131.074	149.07	159.126	159.126	93.058	294.122	157.02	119.048	210.137	103.063	103.063	160.085	159.126	185.105	185.105	169.085	220.085	229.089	140.059	151.063	202.143	188.116
				Formula	C3 H9 N O	C10 H10 N2	C10 H10 N2	C6 H7 N5	C6 H8 N2	C9 H8 O3	C7 H8 O3	C9 H14 N2 O3	C7 H8 O5	C10 H8 N2	C9 H9 N O3	C8 H7 N	C9 H7 N O	C9 H7 N O	C8 H8 O4	C6 H9 N O S	C10 H12 O2	C5 H9 N O	C5 H9 N O	C5 H7 N3 O	C6 H13 N O2	C7 H6 Cl N3	C10 H9 N O	C9 H9 N	C6 H7 N5	C8 H17 N O2	C8 H17 N O2	C6 H7 N	C14 H18 N2 O5	C6 H7 N O2 S	C6 H5 N3	C11 H18 N2 O2	C4 H9 N O2	C4 H9 N O2	C6 H12 N2 O3	C8 H17 N O2	C9 H15 N O3	C9 H15 N O3	C7 H11 N3 O2	C11 H12 N2 O3	C9 H15 N3 O2 S	C6 H8 N2 O2	C8 H9 N O2	C8 H18 N4 O2	C8 H16 N2 O3
				Annotation level	2b	2b	2b	2b	2b	2b	2b	2b	2b	2b	2b	2b	2b	2b	2b	2b	2b	2b	2b	2b	2b	2b	2b	2b	2b	2b	2b	2b	2b	2b	2b	2b	2b	2b	2b	2b	2b	2b	2b	2b	2b	2b	2b	2b	2b
				Name	(S)-(+)-2-Amino-1-propanol	1,5-Naphthalenediamine	1,5-Naphthalenediamine	1-Methyladenine	2,5-Dimethylpyrazine	2-Hydroxycinnamic acid	2-Methoxyresorcinol	3-(1-hydroxyethyl)-2,3,6,7,8,8a-hexahydropyrrolo[1,2-a]pyrazine-1,4-dione	3-Hydroxy-2,6-bis(hydroxymethyl)-4H-pyran-4-one	4,4'-Bipyridine	4-Acetamidobenzoic acid	4-Ethynylaniline	4-Indolecarbaldehyde	4-Indolecarbaldehyde	4-Methoxysalicylic acid	4-Methyl-5-thiazoleethanol	4-Phenylbutyric acid	4-Piperidone	4-Piperidone	5-Methylcytosine	6-Aminocaproic acid	6-Chloro-5-methyl-1H-1,2,3-benzotriazole	6-Methoxyquinoline	6-Methylindole	7-Methyladenine	Acetyl-β-methylcholine	Acetyl-β-methylcholine	Aniline	Aspartame	Benzenesulfonamide	Benzotriazole	Cyclo(leucylprolyl)	D-Alanine methyl ester	D-Alanine methyl ester	Daminozide	DL-α-Aminocaprylic acid	Ecgonine	Ecgonine	Ipronidazole	L-5-Hydroxytryptophan	L-Ergothioneine	Methylimidazoleacetic acid	N-(Hydroxymethyl)benzamide	N3,N4-Dimethyl-L-arginine	N6-Acetyl-L-lysine
				Compound #	X0023	X0828	X0829	X0715	X0224	X0903	X0596	X1394	X1029	X0800	X1132	X0310	X0649	X0650	X0966	X0623	X0907	X0140	X0141	X0382	X0483	X0949	X0838	X0475	X0714	X0844	X0846	X0110	X2504	X0816	X0334	X1573	X0185	X0186	X0856	X0845	X1217	X1218	X0990	X1710	X1848	X0597	X0744	X1465	X1259
Sample #	Sample ID	Sample class		Unit	Area	Area	Area	Area	Area	Area	Area	Area	Area	Area	Area	Area	Area	Area	Area	Area	Area	Area	Area	Area	Area	Area	Area	Area	Area	Area	Area	Area	Area	Area	Area	Area	Area	Area	Area	Area	Area	Area	Area	Area	Area	Area	Area	Area	Area
CS2784	A_P1	Control			1.096e+07	11650.1	52576.2	45851.9	2334.91	259712	131259	284279	24887.8	49591.2	247548	65930.6	5688.93	48087.6	44048.5	4344.16	46395.3	202481	1.0541e+07	17828.4	478672	9626.92	13480.3	10997.2	311.288	23854.2	492062	35444.4	3634.25	1.91282e+06	25417	7555.65	1.05718e+06	308089	869.883	13827.9	344267	15858.6	14324.1	1878	203870	80742.9	26391.6	591588	80530.7
CS2785	A_P2	Control			1.14021e+07	13822.7	56147.8	40578.7	1555.32	236103	134718	325244	28736.3	49794.5	216009	69437.6	7073.04	48246	45054.2	3929.87	28132.6	364966	1.02993e+07	27718.7	625835	12143.1	14534	10407.5	384.734	20785.2	478466	37581.5	3775.11	1.95431e+06	21829.4	7525.25	1.137e+06	320220	751.002	18344.7	369956	17902.2	11987.9	1194.55	160777	84532	29641.9	622483	43224.9
CS2786	A_P3	Control			1.02862e+07	19569.8	57272.6	47308.5	2354.82	310964	119259	306652	27021.2	52346	189389	70586.1	7535.06	49300.6	42330.9	5015.03	59234.5	326419	9.96601e+06	21826.5	591074	13092.1	14402.6	11156.3	317.027	25319.4	561358	22490.6	14542.9	1.65954e+06	19804.5	18945.7	1.10681e+06	513540	875.401	15457.8	447581	24339.8	15482.8	1860.02	175799	145294	16885.3	661004	66189.6
CS2787	A_P4	Control			1.21253e+07	16695.8	57330.3	49493.1	3900.14	285930	155408	302877	29473.5	51315.2	229890	70416.1	6758.18	46532.8	51448.1	4909.34	40984.7	283372	1.08807e+07	21241.9	592171	10850.2	14972.3	11168.8	400.297	20901.1	589115	29052.2	5182.06	2.44142e+06	28575.4	11164.3	1.13509e+06	370584	789.501	15999.6	344272	15364	13514.2	1762.78	239214	75944.7	23024	525167	75601.4
CS2788	A_P5	Control			1.10284e+07	16300.9	62999.2	43129.8	1192.71	287983	113471	446793	25068.9	53774.9	189899	76432	5842.09	48947.2	38605.7	4800.7	41928.2	458286	9.44055e+06	22487.6	674078	11854.2	16497.7	10843.6	333.045	29794.7	595669	35604.8	5322.68	2.19275e+06	37797.8	6979.97	1.15585e+06	335588	830.673	16207.1	443464	23310.8	11139.5	1364.67	152448	107557	28607.1	520918	49860.7
CS2789	A_P6	Control			1.15581e+07	25495.8	56686	51390.9	2211.07	169611	95433.4	444259	21267.8	52128.7	154418	70366.3	9258.57	48466	32461.7	3838.54	82372	168107	1.01475e+07	24862.8	708360	25493.1	15865.6	11763.3	362.392	38790.5	638225	37496.8	8561.39	1.83585e+06	49730.3	19562.3	1.32961e+06	381294	886.015	21068.7	544190	41207.1	27000.8	2942.43	176321	338426	30692	500562	122454
CS2790	B_P1	SE			1.21709e+07	19690.7	49114.1	46499	1611.87	286870	199401	389661	48658.8	44096.2	623841	62192.3	8621.33	46120.9	67270.4	4915.67	60717.2	330737	9.96876e+06	18740.6	865155	19958.4	12242.7	11377	720.584	43369.8	867098	32473.9	3408.7	2.08938e+06	25555.5	8000.26	1.32276e+06	451018	993.142	12921.8	301801	13111	20374.9	2164.48	242453	155905	24323.8	806169	56815.5
CS2791	B_P2	SE			1.41665e+07	16589.1	55084.4	51776.9	2535.31	224499	112118	311325	23401.1	49041.9	807173	67195	12200.6	45013.9	39008	5613.12	64377.3	370486	9.63201e+06	18748.6	844338	17461.3	14899.9	11073.7	728.302	30760.6	991413	32401.3	5490.98	3.2369e+06	23555	36262.5	962976	365923	969.489	14411.9	293774	11237.4	19145.9	1697.25	274840	134920	24156.3	605282	45855.5
CS2792	B_P3	SE			1.49173e+07	17180.1	43570.8	50234.8	1210.52	238631	135998	423044	29615.3	41067.8	660002	53599.1	15656.8	39558.4	46283.7	4728.2	51029.4	311426	1.03252e+07	16305.7	407137	18832.7	11923.8	8662.32	664.654	27030.2	472961	36627.1	4469.6	1.72907e+06	38497.5	10598.9	1.3372e+06	388333	906.968	16394	388872	16317.9	23472.5	2556.48	128781	133725	27296.7	653719	60488.6
CS2793	B_P4	SE			1.18316e+07	23072.3	52668.7	41654.9	4988.4	150795	124109	365893	26735.5	45724.3	498653	65530.3	7362.46	43638.6	42489	3864.46	71854.6	166602	1.01544e+07	16075.5	870067	17819.8	14103.7	10006.3	671.988	38323.6	843332	30098.3	7053.13	1.70441e+06	34998	20384.2	1.35772e+06	345413	921.915	12269.7	253673	11848.1	19022.2	2408.95	253214	187504	23881.8	526903	90473.3
CS2794	B_P5	SE			1.22255e+07	16422.5	50377.2	46057.2	2890.41	208047	146301	238388	33524.6	45429.8	483274	63324.4	11981.3	47059.8	51338.6	3863.11	60657.5	165999	1.04064e+07	14577.2	433994	14508.8	14016	10814.6	717.337	36926.9	544957	25119.6	6871.16	1.96823e+06	11883.2	15838.5	1.05277e+06	384119	855.038	10194.6	252374	11145.3	12656.9	2312.28	172205	79175.4	21512.3	626939	104408
CS2795	B_P6	SE			1.13204e+07	19215	60395.4	40687.9	2288.62	274419	179734	370787	39692.7	53541.1	509177	74009.4	7234.33	48098.2	59638	5844.8	78206.1	366942	1.09641e+07	13732.5	660255	16158.8	15520.6	11749.9	814.826	31245.6	599658	38975.9	8133.55	1.71432e+06	21339.8	12101.7	1.30051e+06	381832	852.01	13824.1	318613	16539.9	11934.6	1919.93	235124	84644.6	29554.4	638728	63989.5
CS2796	C_P1	LE			1.2427e+07	19823.5	56857.5	41600.1	3731.97	363872	120103	352879	26544.9	49444.4	396847	70134.7	7349.91	50462.3	41851.3	4345.14	44255	245526	1.08587e+07	18512.9	693052	18036.1	13869.1	11985.4	679.404	29947.9	792555	31962.1	6607.64	2.20633e+06	20316	14742.7	1.33176e+06	454782	742.464	12443.3	394099	20991.3	13557.2	2420.93	253144	103303	24485.9	735088	73962.6
CS2797	C_P2	LE			1.10028e+07	12939.1	52968.8	40993.7	4496.1	268492	106431	245496	21826.1	46674.1	408758	64571.5	10398	43441	36182.3	5931.77	44993.6	298877	8.67635e+06	13737.3	649033	11326.6	14751.1	10237.4	652.92	41929.6	995649	35261.9	5474.76	2.28824e+06	18159.7	9844.36	854081	475497	920.773	8938.96	344670	14881.9	10516.1	1548.07	312502	107960	30392.5	578762	55305.1
CS2798	C_P3	LE			1.042e+07	15307.9	69387.5	42854.3	2850.3	400962	138607	388280	29378.3	59586.9	401792	84261.6	5409.3	53385.9	46303	5274.89	34198	392942	9.82106e+06	22427	760815	10650.2	18140.3	11964	525.707	23563.9	636330	23613.5	4229.24	1.83506e+06	25177.8	9027.93	1.26352e+06	456628	736.372	16269.5	295676	14651.2	8743.62	1820.95	204866	75396.8	17378.8	519072	51091.8
CS2799	C_P4	LE			1.23547e+07	11465.5	53269.4	59284.9	1764.98	240653	150547	422610	32060.9	49197.5	585514	66289.7	17556.4	46433	52662.7	4249.82	60666.9	340236	1.0821e+07	24496	624818	18132.4	12991.3	10139.3	622.16	40162.7	564377	29798.5	1545.59	2.71734e+06	38489.6	11774.2	1.3621e+06	271377	827.399	15429	293329	15332.7	17870.5	2759.81	141127	108325	25096.6	648174	59491.9
CS2800	C_P5	LE			1.0861e+07	20522.1	63840.4	42374.5	3610.43	172659	81137.8	362842	18221	55226.4	409017	77538.7	11008.1	50516.7	26237.3	4891.02	79803.8	151432	1.01624e+07	20506.6	621946	21847.1	17742.6	12057.1	453.944	35258.3	656492	21852.3	6495.38	1.94306e+06	33156.3	8126.19	979634	421209	1057.58	12000.1	444260	23203.5	18818.1	2461.55	215236	233690	16596.1	574419	152503
CS2801	C_P6	LE			1.20973e+07	31807.6	57186.8	57482.7	2015.54	191983	161509	332361	36699.1	53831	378976	71758.5	9216.37	49781	54089	3657.02	51737.3	206998	8.90062e+06	19826.6	755713	27714.6	15628.9	11040.5	532.562	59270	903592	23015.8	9694.42	1.59959e+06	20539.9	9038.8	1.05357e+06	404308	892.94	9588.92	653512	27121.5	21888	3094.93	199678	111220	14700	711811	121994
[truncated: 30 more columns]

## Sheet: Annotation level 3
				DP	1.27843	2.94228	7.75383	6.21328	3.97531	5.511	8.89174	6.96108	4.3288	1.77953	4.11529	7.17572	5.67837	5.15449	2.14121	5.59998	4.36502	3.39397	1.2528	3.65138	7.44192	4.17452	0.967878	1.59045	13.5848	9.61862	4.4537	9.21917	5.18575	7.53524	2.83456	2.83456	1.89429	8.53087	9.01156	2.99374	9.32698	8.32929	3.09651	9.74652	2.48402	4.17542	3.20757	1.29771	9.23881
				Relative precision (%)	3.49347	5.49539	2.92344	5.196	13.5721	6.10942	3.63758	4.56192	4.65233	5.20871	7.85418	4.16664	17.2086	2.16559	13.9152	3.422	2.81216	14.5747	17.0583	5.79924	2.86456	1.92822	6.38601	12.4576	2.77205	3.70352	3.11033	2.7317	5.54036	4.90966	3.06651	3.06651	4.27907	3.00745	3.62673	4.77748	2.28938	1.55099	5.97167	3.65148	15.8886	5.46534	3.72365	6.61112	2.84652
				LOD	80473	65.698	1776.81	52.3417	11150.8	798.975	1575.21	636.416	215.028	69.0036	142.065	51.7621	327.71	1738.49	64.9073	50.9455	50.8681	279.795	1273.95	970.955	317.932	76.0216	286.297	99.3722	805.337	110.252	1418.68	287.702	59.214	745.709	6809.25	7755.18	12461.8	6938.45	165.477	1964.84	2344.79	1350.65	92.7974	42.2538	1305.14	1811.89	101.679	6558.62	63.8016
				RT [min]	1.158	1.628	5.017	4.929	8.08	7.398	7.234	7.545	2.083	1.89	4.425	4.634	7.435	1.313	1.154	4.867	2.771	7.085	7.626	2.079	2.074	1.273	6.236	1.084	1.567	1.424	1.887	4.565	5.12	3.538	4.076	4.215	4.444	2.797	2.244	1.474	2.461	4.783	1.34	2.422	7.655	6.51	2.486	4.701	1.686
				Molecular Weight	225.944	426.088	173.117	173.117	195.163	373.246	285.194	311.21	156.042	244.106	247.142	247.142	215.056	120.042	336.052	241.106	258.122	181.074	334.214	108.021	204.063	214.057	157.053	273.966	69.058	147.09	147.09	118.042	207.039	187.121	85.0893	85.0893	85.0893	85.0893	367.148	111.069	147.09	147.09	286.156	254.09	160.11	196.121	103.046	85.0529	126.025
				Formula	C6 H4 Cl2 O5	C13 H22 N4 O8 S2	C7 H15 N3 O2	C7 H15 N3 O2	C12 H21 N O	C19 H35 N O6	C15 H27 N O4	C17 H29 N O4	C7 H8 O4	C10 H16 N2 O5	C11 H21 N O5	C11 H21 N O5	C5 H14 N O6 P	C4 H8 O4	C12 H16 O9 S	C10 H15 N3 O4	C11 H18 N2 O5	C9 H11 N O3	C20 H30 O4	C6 H4 O2	C8 H12 O6	C12 H10 N2 S	C10 H7 N O	C5 H11 As O8	C4 H7 N	C6 H13 N O3	C6 H13 N O3	C8 H6 O	C7 H5 N5 O3	C9 H17 N O3	C5 H11 N	C5 H11 N	C5 H11 N	C5 H11 N	C14 H25 N O10	C6 H9 N O	C6 H13 N O3	C6 H13 N O3	C18 H22 O3	C11 H14 N2 O5	C8 H16 O3	C10 H16 N2 O2	C4 H9 N S	C4 H7 N O	C5 H6 N2 S
				Annotation level	3	3	3	3	3	3	3	3	3	3	3	3	3	3	3	3	3	3	3	3	3	3	3	3	3	3	3	3	3	3	3	3	3	3	3	3	3	3	3	3	3	3	3	3	3
				Name	(2E)-2,5-Dichloro-4-oxo-2-hexenedioic acid	(2S)-2-Amino-5-({(2R)-3-[(2-amino-2-carboxyethyl)disulfanyl]-1-[(carboxymethyl)amino]-1-oxo-2-propanyl}amino)-5-oxopentanoic acid (non-preferred name)	(2S)-6-Amino-2-[(E)-(hydroxymethylene)amino]hexanimidic acid	(2S)-6-Amino-2-[(E)-(hydroxymethylene)amino]hexanimidic acid	(3-Amino-5-methyladamantan-1-yl)methanol	(4S)-4-[(11-Carboxyundecanoyl)oxy]-4-(trimethylammonio)butanoate	(4S)-4-[(2E)-2-Octenoyloxy]-4-(trimethylammonio)butanoate	(4S)-4-[(2E,4Z)-2,4-Decadienoyloxy]-4-(trimethylammonio)butanoate	(5E)-5-(2-Hydroxyethylidene)-3-(hydroxymethyl)-2(5H)-furanone	(5Z)-2-Amino-4,5-dihydroxy-5-{[(1E)-2-(hydroxymethyl)-1,3-butadien-1-yl]imino}pentanoic acid (non-preferred name)	(R)-3-hydroxybutyrylcarnitine	(R)-3-hydroxybutyrylcarnitine	(S)-?-glycerophosphorylethanolamine	(S)-3,4-Dihydroxybutyric acid	(Sulfooxy)methyl 5-(3,4-dihydroxyphenyl)-4-hydroxypentanoate	1-(3-Amino-2,3-dideoxypentofuranosyl)-5-methyl-2,4(1H,3H)-pyrimidinedione	1-(4-Amino-4-carboxybutanoyl)-2-piperidinecarboxylic acid	1,2,3,4-Tetrahydro-4,6,7-isoquinolinetriol	1,2,3-Trihydroxy-14-methyl-13-vinylpodocarp-12-en-11-one	1,2-Benzoquinone	1,4,5-Trihydroxy-5-hydroxymethyl-2-methoxycyclohex-1-en-3-one	1-Methyl-3-(1,3-thiazol-2-yl)-1H-indole	1-Nitrosonaphthalene	1-O-Arsonopentofuranose	1-pyrroline	2-(Hydroxymethyl)-3,4-piperidinediol	2-(Hydroxymethyl)-3,4-piperidinediol	2,4,6-Octatriyn-1-ol	227689	2360791	2908	2908	2908	2908	2-Acetamido-2-deoxy-3-O-(6-deoxy-alpha-L-galactopyranosyl)-D-glucose	2-Acetyl-1-pyrroline	2-Amino-4-hydroxy-3-methylpentanoic acid	2-Amino-4-hydroxy-3-methylpentanoic acid	2-Hydroxyestrone	2-Hydroxyfelbamate	2-Hydroxyoctanoic acid	2-Isopropyl-3,5-dimethoxy-6-methylpyrazine	2-Methylthiazolidine	2-Pyrrolidone	3231
				Compound #	X1790	X3272	X1053	X1054	X1354	X3048	X2415	X2648	X0799	X2005	X2042	X2043	X1635	X0344	X2849	X1972	X2163	X1162	X2836	X0221	X1485	X1618	X0817	X2317	X0010	X0690	X0692	X0322	X1526	X1245	X0055	X0056	X0057	X0058	X3017	X0249	X0691	X0694	X2428	X2130	X0860	X1367	X0183	X0054	X0387
Sample #	Sample ID	Sample class		Unit	Area	Area	Area	Area	Area	Area	Area	Area	Area	Area	Area	Area	Area	Area	Area	Area	Area	Area	Area	Area	Area	Area	Area	Area	Area	Area	Area	Area	Area	Area	Area	Area	Area	Area	Area	Area	Area	Area	Area	Area	Area	Area	Area	Area	Area
CS2784	A_P1	Control			1.48273e+06	44384.7	226704	1801.22	170962	18250.8	10876.5	10842.1	188946	832937	15149.9	18825.4	1281.74	1.84395e+06	548.696	4461.17	14772.5	1246.94	5514.22	137335	2.01787e+06	99496.9	26324.3	10814.9	76663.9	5287.6	44436.4	44299.7	265.286	8408.81	2.33204e+06	2.33204e+06	2.50478e+06	481931	22405.5	2.03813e+06	40717.6	75983.7	731.093	38891.1	18355.6	22595.8	158647	550414	5194.26
CS2785	A_P2	Control			1.38139e+06	47003.6	216750	1281	254277	16674.1	10932.2	10926.2	201202	786874	17033.4	16599.1	1618.23	1.96096e+06	384.568	7658.11	11261.3	1355.18	5387.19	140860	2.27846e+06	94102.2	27104.3	10277.2	59215	3762.29	59567.2	39655.8	327.877	10911.6	2.25412e+06	2.25412e+06	2.19429e+06	459754	20329.3	2.65291e+06	46713.2	84359.4	806.359	24427.1	11006.2	28729.8	161800	521902	5099.54
CS2786	A_P3	Control			1.44625e+06	53036.3	236980	3718.26	158885	24696.3	17954.5	16586.8	176880	769157	24062.7	23803.4	1323.05	1.79746e+06	414.83	5989.52	13428.2	753.533	5245.46	124691	2.20887e+06	102149	29004.2	7944.84	86467.2	5513.12	57381.5	52573	270.176	12895.2	2.49393e+06	2.49393e+06	2.7059e+06	374277	12855.9	2.49832e+06	50158.2	84763.2	666.513	13045.9	13582.7	33036.6	144014	487842	4988.48
CS2787	A_P4	Control			1.2537e+06	46183.6	195862	1463.18	391707	33708.4	17859.1	18341.4	206715	856212	22950.8	21718	1209.47	1.70954e+06	514.341	5527.08	14184.2	1828.48	6636.3	161911	2.4567e+06	91335.9	28452.9	14620.2	51652.3	4047.49	48640	49286.6	341.14	13988.2	2.11043e+06	2.11043e+06	2.16939e+06	580464	30349.4	2.05996e+06	57640.6	82601.2	823.139	36526.4	34487.6	32289.4	168842	531301	6661.97
CS2788	A_P5	Control			1.33282e+06	48418.2	322019	1675.37	350119	22602.2	12694.7	12550.3	162428	728914	34631.9	38812.1	1015.55	1.82602e+06	351.392	5732.61	10943.2	563.584	5811.96	118584	2.12092e+06	86468.3	25247.1	7788.72	70519.9	5462.6	57311.7	45320.7	283.827	8954.32	2.56728e+06	2.56728e+06	2.63533e+06	594010	27159.1	2.10868e+06	53003.1	107262	782.095	27255.2	9593.73	24707	166470	477490	4887.83
CS2789	A_P6	Control			1.38538e+06	57207.5	324105	3193.39	213722	45508.2	29953.2	29931.7	141458	740662	49309.3	46483.7	3937.07	1.80249e+06	351.055	6930.59	13364.2	2020.95	5078.93	99915.6	1.72638e+06	101945	29672.5	11340.8	52604.8	7886.84	66625.3	28848.4	308.837	16260.4	2.53899e+06	2.53899e+06	2.41191e+06	339120	12765.6	2.89767e+06	82718	105651	756.761	18473.1	25927.8	40721.9	133624	535435	4363.32
CS2790	B_P1	SE			1.42047e+06	50282.8	300615	3187.97	373900	39173.1	19849.4	21373.6	280593	872115	38584.1	35145.6	1432.5	2.0843e+06	610.805	5221.19	15427.9	1036.59	6763.97	208280	3.69788e+06	104376	26879.9	14517	60154.3	5510.61	63864	49836.2	614.094	19769.3	2.25436e+06	2.25436e+06	2.34009e+06	772236	22925.4	2.80632e+06	63305.8	104607	1270.04	27844.6	30821.4	27278.7	142134	504750	6551.86
CS2791	B_P2	SE			1.38526e+06	57776.6	271987	2405.49	282782	26438.4	17712.2	16745.1	166146	951882	31758.8	23388.5	5665.45	2.39787e+06	527.334	4999.68	16687.7	2140.73	7448.13	117255	1.98793e+06	111374	29092.6	14403.9	55006.8	4877.94	51606.2	39251.6	620.672	19355.6	2.20773e+06	2.20773e+06	2.28618e+06	535980	22987.5	2.21934e+06	67065.1	84020.3	882.115	25875.1	22661.2	51319	136811	434581	7309.8
CS2792	B_P3	SE			1.36725e+06	56606.5	303117	1922.68	237028	34769.8	22515.8	21676.7	198026	712975	25631.7	27270.5	1325.2	2.46278e+06	368.016	4441.41	14438.3	900.242	5287.14	142420	2.42888e+06	107853	25294.1	13206.4	51221.5	4790.82	65576.2	41889.3	566.43	11264.7	2.01608e+06	2.01608e+06	2.13429e+06	423333	16722.2	2.35414e+06	82740.5	102185	954.364	31764.8	29271.4	28809.5	129870	485787	2097.25
CS2793	B_P4	SE			1.37423e+06	64967.8	260377	2205.74	178102	52262.4	27957.4	19082.5	180712	731725	32664.1	29955.7	1697.22	1.86779e+06	873.292	4289.49	12071.8	1414.36	5896.25	129699	2.18199e+06	101188	25883.2	11994.2	70047.6	5660.49	64622.4	26431	572.68	24574.5	2.05754e+06	2.05754e+06	2.10128e+06	441260	17755.2	3.17806e+06	60358.9	93553.6	818.296	25070.1	40265.2	38894	139081	500908	7211.58
CS2794	B_P5	SE			1.33042e+06	51344.2	209487	2297.14	142935	18165.8	14148.2	13692.1	209259	823255	17252.8	17314.4	2391.75	2.09884e+06	350.604	3944.15	13527.1	1292.06	7348.55	152995	2.52446e+06	97357.4	29394.1	15287.9	149425	7309.96	49098.6	35214.8	611.327	9974.46	2.40882e+06	2.40882e+06	2.46504e+06	452369	13411.3	1.9162e+06	49452.9	76198.3	1259.06	58513.8	11894.9	29487.7	166224	567729	5637.56
CS2795	B_P6	SE			1.3498e+06	53379.1	320728	1885.97	215263	24198.3	16136.4	13965.3	253563	843746	25359.2	24538.6	1015.69	1.69072e+06	373.595	3643.07	16130.5	805.822	5516.1	187697	3.19349e+06	95635.3	28983.5	16157	61839	1216.6	66017.9	46346	694.409	22379	2.15484e+06	2.15484e+06	2.3107e+06	496343	15966.3	2.20799e+06	52215.5	108455	886.446	24723.4	14407.8	33315.8	145822	598918	6132.78
CS2796	C_P1	LE			1.47119e+06	61056.3	301832	1992.67	182851	42663.8	26884.5	25595.7	167554	667426	26530.6	26530.6	1320.96	2.20336e+06	385.814	4940.64	12557.6	1848.55	5931.84	125544	2.14548e+06	107997	28459	11786.4	79314.8	5203.24	59182.3	63066	579	14187.2	2.56083e+06	2.56083e+06	2.67469e+06	407105	16134.2	2.53869e+06	50319.6	104966	847.239	41508.1	23441	36288.7	174650	504602	6861.3
CS2797	C_P2	LE			1.33612e+06	47115.7	172770	1887.13	256410	21224.5	13215.5	11400.3	151401	872133	23010.5	24383.7	1336.39	2.06643e+06	571.435	3954.67	16141.9	922.028	6070.31	111216	1.79046e+06	114044	25544.4	12165.4	142915	5591.91	41935.3	47060.2	556.43	25791.3	2.68352e+06	2.68352e+06	2.58443e+06	415834	16677.7	1.84035e+06	38674.2	72520.8	957.212	34136.9	17044.3	23412.9	151677	401741	8186.71
CS2798	C_P3	LE			1.31826e+06	53434.6	321676	1478.75	126713	23927.9	19207.9	16917.8	201383	673636	24333.5	19014.5	631.067	1.9324e+06	401.69	5947.98	11739.5	712.934	5489.87	144183	2.37707e+06	85952.4	30206.2	10003.9	64903.3	1030.55	62431.3	67941.2	448.017	19585.6	2.44803e+06	2.44803e+06	2.52084e+06	498624	29205.3	2.21528e+06	43982.3	107152	806.281	25595.3	12565.7	28796.4	167708	476957	5796.06
CS2799	C_P4	LE			1.31426e+06	52383.7	412741	2085.25	177773	28705.2	20084.3	21371	220370	820964	28173.1	28549.2	2142.56	2.32566e+06	500.528	6568.56	15101.5	1764.69	9154.21	157602	2.53343e+06	99568.9	29781.8	13403.7	59084.3	5501.38	67594.2	41846.7	530.216	6801.49	2.28167e+06	2.28167e+06	2.39477e+06	628691	18741.8	2.36621e+06	60661.9	100933	898.163	61907.9	19648.7	34599.6	114775	527553	1933
CS2800	C_P5	LE			1.31702e+06	70377.2	221411	2808.19	139622	34998.6	23585.2	19597.3	112579	860794	38021.5	35351.5	851.047	2.22003e+06	380.454	5807.82	16025.2	406.699	5666.82	84697.6	1.51119e+06	114217	27640.3	10521.7	104630	7027.01	48531.3	26887	386.859	24163.9	2.78883e+06	2.78883e+06	2.77485e+06	904166	24119.6	2.53751e+06	65172.3	94600	817.353	18152.1	31849.9	26376.2	151582	528808	5914.52
CS2801	C_P6	LE			1.33102e+06	83042.2	199479	3711.16	155112	43114.4	35750.4	30003	225081	749037	45673.8	45470.4	775.595	1.97525e+06	348.5	5519.99	12848.6	566.261	4323.01	169216	2.96257e+06	102955	30259.6	9034.66	69084.9	10336.3	56950.1	32184.1	453.859	11603.5	2.37623e+06	2.37623e+06	2.54394e+06	659623	5824.51	2.38557e+06	70543.8	85299	864.684	36731	27159	25636.4	109903	478409	5646.87
[truncated: 152 more columns]

## Sheet: Univariate statistics
			Q	0.05		P<(i/m)Q is coloured with green
			t-tests						Log2 Ratios
			control vs SE			control vs LE
Annotation level	Compound	Comp #	P-value	Rank	(i/m)Q	P-value2	Rank2	(i/m)Q2	SE/control	LE/control
2b	4-Acetamidobenzoic acid	X1132	2.35828e-05	4	0.00147059	6.14627e-05	1	0.000367647	1.48094	0.997748
1	Inosine	X2269	1.66593e-09	1	0.000367647	7.37843e-05	2	0.000735294	1.49169	1.1826
2b	Valpromide	X0635	0.011655	9	0.00330882	9.90877e-05	3	0.00110294	-1.10376	-1.0618
2b	7-Methyladenine	X0714	7.48768e-08	2	0.000735294	0.000159967	4	0.00147059	1.04799	0.731553
2a	Guanosine	X2392	0.000737249	6	0.00220588	0.000182208	5	0.00183824	-0.742596	-0.901242
2a	Biotinsulfoxide	X2179	3.65693e-06	3	0.00110294	0.00222613	6	0.00220588	0.935877	0.517416
2b	Sulfanilic acid	X1047	0.415161	79	0.0290441	0.00848969	7	0.00257353	0.0182681	-0.703291
2a	Gluraic acid/ethylmalonic acid	X0494	0.836737	124	0.0455882	0.00887592	8	0.00294118	0.237815	0.22036
2b	DL-α-Aminocaprylic acid	X0845	0.0268903	15	0.00551471	0.0208382	9	0.00330882	-0.268043	-0.397917
2b	Acetyl-β-methylcholine	X0846	0.100104	33	0.0121324	0.021673	10	0.00367647	0.326834	0.332877
2b	Propachlor OXA	X1527	0.0815061	29	0.0106618	0.0217887	11	0.00404412	1.51818	1.20521
1	Uridine	X2002	0.00561589	8	0.00294118	0.0228974	12	0.00441176	-1.08626	-0.705243
1	L-Pyroglutamic acid	X0431	0.0727587	27	0.00992647	0.0270572	13	0.00477941	0.317135	0.43176
1	Hypoxanthine	X0558	2.9646e-05	5	0.00183824	0.0296279	14	0.00514706	0.77614	0.392165
1	Nicotinic acid	X0363	0.0507007	22	0.00808824	0.0506499	15	0.00551471	-1.00724	-1.47546
2b	Acetyl-β-methylcholine	X0844	0.0557657	23	0.00845588	0.0670397	16	0.00588235	0.471303	0.617079
1	Glutathione oxidized	X3653	0.0141937	11	0.00404412	0.07647	17	0.00625	0.311144	0.303443
1	Valine	X0312	0.663449	106	0.0389706	0.0864864	18	0.00661765	-0.0391591	0.124993
2b	Tranexamic acid	X0819	0.189787	47	0.0172794	0.0885529	19	0.00698529	0.388076	0.432518
2b	Uric acid	X0964	0.95012	135	0.0496324	0.0889863	20	0.00735294	-0.161743	-0.476937
2a	Glutamine	X0669	0.0570943	24	0.00882353	0.108909	21	0.00772059	0.108086	0.158253
2b	4-Indolecarbaldehyde	X0649	0.0385573	19	0.00698529	0.109625	22	0.00808824	0.574902	0.503983
2b	6-Aminocaproic acid	X0483	0.482848	88	0.0323529	0.110996	23	0.00845588	0.304851	0.139955
1	UMP	X2748	0.153675	42	0.0154412	0.112395	24	0.00882353	-0.0294047	0.10995
2b	Triisopropanolamine	X1302	0.787321	120	0.0441176	0.117295	25	0.00919118	-0.19173	1.74612
2a	Creatinine	X0266	0.364122	68	0.025	0.121967	26	0.00955882	-0.196298	-0.269313
1	Acetylcholine	X0657	0.387661	71	0.0261029	0.128026	27	0.00992647	0.276944	0.534056
1	Decanoylcarnitine	X2684	0.16921	44	0.0161765	0.133705	28	0.0102941	0.486583	0.462727
2b	Aniline	X0110	0.91907	133	0.0488971	0.138402	29	0.0106618	-0.13115	-0.411654
2b	Triisopropanolamine	X1303	0.995262	138	0.0507353	0.139478	30	0.0110294	-0.0847867	1.97949
1	Citrulline	X1090	0.0156101	12	0.00441176	0.140741	31	0.0113971	0.73307	0.396665
2a	Phosphoenolpyruvic acid	X0963	0.11712	35	0.0128676	0.142649	32	0.0117647	0.16997	0.0668501
2b	Quinoline	X0435	0.222119	51	0.01875	0.144889	33	0.0121324	-0.0608421	0.0847086
1	Leucine	X0477	0.561759	96	0.0352941	0.15226	34	0.0125	-0.0441491	0.204279
2b	Taurochenodeoxycholic acid	X3476	0.75212	114	0.0419118	0.160042	35	0.0128676	0.842464	1.96191
2b	Putrescine	X0084	0.56705	97	0.0356618	0.161992	36	0.0132353	0.0614803	-0.112152
2b	L-5-Hydroxytryptophan	X1710	0.251306	55	0.0202206	0.162402	37	0.0136029	0.305349	0.430505
2b	2,5-Dimethylpyrazine	X0224	0.629467	101	0.0371324	0.185301	38	0.0139706	0.0856166	0.507106
1	Taurocholic acid	X3509	0.87167	129	0.0474265	0.188473	39	0.0143382	0.345142	-0.314726
1	Proline	X0292	0.633799	103	0.0378676	0.198727	40	0.0147059	-0.0931623	0.118111
2b	Prolylleucine	X1841	0.0483837	21	0.00772059	0.199325	41	0.0150735	0.219355	0.108138
2b	L-Ergothioneine	X1848	0.23525	52	0.0191176	0.205621	42	0.0154412	0.439666	0.254674
2b	N-(Hydroxymethyl)benzamide	X0744	0.761417	116	0.0426471	0.206076	43	0.0158088	-0.182003	-0.393658
2b	5-Methylcytosine	X0382	0.00294149	7	0.00257353	0.207508	44	0.0161765	-0.452609	-0.135797
1	Malic acid	X0529	0.0934649	32	0.0117647	0.214608	45	0.0165441	0.684959	0.51803
2b	N3,N4-Dimethyl-L-arginine	X1465	0.142897	41	0.0150735	0.21505	46	0.0169118	0.180586	0.135747
2a	Creatine	X0472	0.687391	110	0.0404412	0.242172	47	0.0172794	-0.1076	0.0756061
2a	Cystine	X1952	0.390602	74	0.0272059	0.258884	48	0.0176471	0.0293373	0.0523014
2a	alpha-Ketoglutaric acid	X0665	0.309898	64	0.0235294	0.262393	49	0.0180147	0.421559	0.356019
2b	6-Chloro-5-methyl-1H-1,2,3-benzotriazole	X0949	0.180043	46	0.0169118	0.273817	50	0.0183824	0.556018	0.591859
2b	Prolylleucine	X1842	0.126142	38	0.0139706	0.30311	51	0.01875	0.152847	0.11976
2b	Prolinamide	X0283	0.841782	126	0.0463235	0.316686	52	0.0191176	-0.04548	-0.0695401
2b	Oxepanone	X0281	0.218006	50	0.0183824	0.31948	53	0.0194853	0.395463	-0.184911
2a	Glycine	X0022	0.762766	117	0.0430147	0.323972	54	0.0198529	0.0959896	0.421781
2a	Allantoin	X0826	0.297961	59	0.0216912	0.337136	55	0.0202206	0.111056	0.114154
2b	D-Alanine methyl ester	X0186	0.676976	108	0.0397059	0.349244	56	0.0205882	0.117232	0.310895
1	Choline	X0187	0.175017	45	0.0165441	0.35003	57	0.0209559	-0.0206543	-0.0391536
2a	Ketoleucine	X0462	0.546162	93	0.0341912	0.356032	58	0.0213235	-0.101471	0.328699
2b	N-Acetyl-L-leucine	X1050	0.214372	49	0.0180147	0.359072	59	0.0216912	0.25717	0.0822995
1	Riboflavin	X3061	0.470229	86	0.0316176	0.360456	60	0.0220588	0.168996	-0.111568
2a	Sorbitol/Manitol	X1180	0.764123	118	0.0433824	0.380582	61	0.0224265	-0.12959	-0.384208
1	Methionine	X0711	0.12623	39	0.0143382	0.391683	62	0.0227941	-0.157204	-0.0781919
2a	Beta-alanine	X0086	0.303149	60	0.0220588	0.433171	63	0.0231618	0.145917	-0.0939086
2a	Serine	X0204	0.429948	83	0.0305147	0.436256	64	0.0235294	0.0409321	0.152006
2b	Ecgonine	X1218	0.0399114	20	0.00735294	0.437221	65	0.0238971	-0.723529	-0.182176
2b	Benzotriazole	X0334	0.47059	87	0.0319853	0.442786	66	0.0242647	-0.136727	-0.240005
1	Threonine	X0336	0.836587	123	0.0452206	0.445907	67	0.0246324	0.0724503	0.487288
2b	4-Piperidone	X0141	0.916542	132	0.0485294	0.448962	68	0.025	0.00231595	-0.0330705
2a	aldopentose	X0723	0.288387	57	0.0209559	0.47508	69	0.0253676	-0.231296	0.224256
2a	Isocitric acid	X1313	0.388419	72	0.0264706	0.482528	70	0.0257353	0.536916	0.526646
2a	Asparagine	X0496	0.413115	78	0.0286765	0.492634	71	0.0261029	0.0600385	-0.0889127
2a	7-Methylguanine	X0919	0.523371	90	0.0330882	0.492865	72	0.0264706	0.187238	0.0557663
2b	(S)-(+)-2-Amino-1-propanol	X0023	0.0355034	18	0.00661765	0.506564	73	0.0268382	0.121206	0.042443
2a	Nicotinamide	X0356	0.818783	122	0.0448529	0.51939	74	0.0272059	-0.0485962	-0.112681
1	Methionine sulfoxide	X0917	0.631022	102	0.0375	0.534313	75	0.0275735	0.0588999	0.0777796
2b	4-Methyl-5-thiazoleethanol	X0623	0.427362	82	0.0301471	0.534454	76	0.0279412	0.0766508	0.0143313
2b	N6-Acetyl-L-lysine	X1259	0.860936	128	0.0470588	0.549448	77	0.0283088	-0.187874	-0.087419
1	Taurine	X0377	0.0240907	14	0.00514706	0.552729	78	0.0286765	0.316941	-0.109734
2b	Cyclo(leucylprolyl)	X1573	0.303508	62	0.0227941	0.567673	79	0.0290441	0.577769	0.0125253
2a	2'-Deoxycytidine	X1816	0.3063	63	0.0231618	0.567764	80	0.0294118	-0.304567	-0.0960444
2b	1,5-Naphthalenediamine	X0829	0.0780682	28	0.0102941	0.568953	81	0.0297794	-0.145223	0.00108334
2b	6-Methoxyquinoline	X0838	0.140244	40	0.0147059	0.569632	82	0.0301471	-0.06944	0.0420968
1	Tryptophan	X1491	0.0686782	25	0.00919118	0.572932	83	0.0305147	-0.0530843	0.0894345
2b	4-Ethynylaniline	X0310	0.0696671	26	0.00955882	0.578984	84	0.0308824	-0.127721	0.0113391
2b	Pyroquilon	X1049	0.238699	53	0.0194853	0.57971	85	0.03125	-0.225307	0.0197121
1	Lysine	X0679	0.303272	61	0.0224265	0.579901	86	0.0316176	-0.08932	0.261184
2b	Aspartame	X2504	0.625414	100	0.0367647	0.580129	87	0.0319853	0.234888	0.1884
2b	N-Acetyltyramine	X1137	0.546921	94	0.0345588	0.585565	88	0.0323529	-0.00951135	-0.151965
2b	Daminozide	X0856	0.0284361	17	0.00625	0.602933	89	0.0327206	0.104956	0.0166862
1	Carnitine	X0866	0.690627	111	0.0408088	0.608997	90	0.0330882	0.0546579	0.0874818
1	3-Methylhistidine	X0989	0.547321	95	0.0349265	0.617036	91	0.0334559	0.030492	0.0556955
2b	Benzenesulfonamide	X0816	0.786296	119	0.04375	0.625814	92	0.0338235	-0.0647932	0.101635
2b	4-Indolecarbaldehyde	X0650	0.0281382	16	0.00588235	0.629652	93	0.0341912	-0.0856923	0.0517403
2b	4-Piperidone	X0140	0.799257	121	0.0444853	0.633152	94	0.0345588	0.0746254	-0.163639
2b	3-Hydroxy-2,6-bis(hydroxymethyl)-4H-pyran-4-one	X1029	0.0880418	31	0.0113971	0.657439	95	0.0349265	0.277543	0.102437
2b	N-Nitrosomethylethylamine (NMEA)	X0082	0.761271	115	0.0422794	0.657443	96	0.0352941	-0.0380344	-0.0546895
2a	(Z)-Aconitic Acid	X1067	0.407528	77	0.0283088	0.664534	97	0.0356618	0.297564	0.187799
2b	6-Methylindole	X0475	0.390953	75	0.0275735	0.666549	98	0.0360294	-0.0173793	0.0543753
1	Tyrosine	X1161	0.425368	81	0.0297794	0.669904	99	0.0363971	-0.12221	-0.0666411
2b	Nikethamide 1-oxide	X1342	0.250726	54	0.0198529	0.685069	100	0.0367647	0.118982	-0.0867825
2b	4,4'-Bipyridine	X0800	0.0236924	13	0.00477941	0.692639	101	0.0371324	-0.182469	-0.00235109
1	Phenylalanine	X0921	0.526196	91	0.0334559	0.693318	102	0.0375	-0.0558475	-0.0729865
2b	Prolinamide	X0284	0.389069	73	0.0268382	0.693709	103	0.0378676	0.242762	0.152449
2b	Tryptoline	X1036	0.943345	134	0.0492647	0.695861	104	0.0382353	-0.269674	-0.119944
2b	N-Butylbenzenesulfonamide	X1606	0.641663	104	0.0382353	0.707598	106	0.0389706	-0.0132306	0.0316679
2b	1,5-Naphthalenediamine	X0828	0.534338	92	0.0338235	0.70863	107	0.0393382	0.141421	0.0904396
1	Propionylcarnitine	X1673	0.696969	112	0.0411765	0.724212	109	0.0400735	0.222795	0.227634
2b	2-Hydroxycinnamic acid	X0903	0.356142	67	0.0246324	0.738378	110	0.0404412	-0.236535	-0.099878
2a	butyrylcarnitine	X1875	0.440609	85	0.03125	0.748322	111	0.0408088	0.0038133	-0.423075
2b	Methylimidazoleacetic acid	X0597	0.836829	125	0.0459559	0.750035	112	0.0411765	0.483925	0.171158
2b	N-Benzylformamide	X0549	0.9137	131	0.0481618	0.751263	113	0.0415441	-0.0849634	-0.206814
2b	Prolinamide	X0286	0.659626	105	0.0386029	0.752227	114	0.0419118	0.00252101	0.398313
1	Pantothenic acid	X1706	0.371245	69	0.0253676	0.755399	115	0.0422794	-0.00787794	0.109414
1	CMP	X2743	0.583492	98	0.0360294	0.769915	116	0.0426471	-0.0765308	-0.0667778
2b	1-Methyladenine	X0715	0.955263	136	0.05	0.77303	117	0.0430147	-0.00938683	-0.128374
1	Adenine	X0544	0.686819	109	0.0400735	0.781576	118	0.0433824	0.0367898	-0.0435512
2b	4-Phenylbutyric acid	X0907	0.120013	36	0.0132353	0.789033	119	0.04375	0.502149	0.131181
1	Thiamine	X2212	0.267953	56	0.0205882	0.790165	120	0.0441176	0.147183	0.000214839
1	Xanthine	X0750	0.433521	84	0.0308824	0.832123	121	0.0444853	0.08283	0.0331056
1	Uracil	X0251	0.113792	34	0.0125	0.843054	122	0.0448529	0.418571	-0.391574
2b	N-Acetylornithine	X1075	0.857854	127	0.0466912	0.855602	123	0.0452206	0.283284	0.645602
2b	Ecgonine	X1217	0.0132511	10	0.00367647	0.862164	124	0.0455882	-0.449717	-0.138877
2b	D-Alanine methyl ester	X0185	0.404198	76	0.0279412	0.893145	125	0.0459559	0.207348	0.0282985
1	Histidine	X0785	0.734024	113	0.0415441	0.893697	126	0.0463235	0.14343	0.125423
2b	N-Ethylglycine	X0184	0.195078	48	0.0176471	0.906796	127	0.0466912	0.175356	-0.0961852
2b	4-Methoxysalicylic acid	X0966	0.120105	37	0.0136029	0.913231	128	0.0470588	0.176524	0.0293449
2b	Ipronidazole	X0990	0.483038	89	0.0327206	0.915883	129	0.0474265	0.455294	0.174966
2b	Valylproline	X1622	0.339305	65	0.0238971	0.919022	130	0.0477941	0.256209	-0.105794
2b	2-Methoxyresorcinol	X0596	0.155279	43	0.0158088	0.923026	131	0.0481618	0.172312	0.0464236
1	Glutamic acid	X0686	0.0819122	30	0.0110294	0.933093	132	0.0485294	0.286646	-0.101986
2b	N-Acetylhistamine	X0761	0.894234	130	0.0477941	0.940858	133	0.0488971	0.301676	0.459443
1	Lactic acid	X0097	0.381702	70	0.0257353	0.965395	134	0.0492647	0.0241365	0.0573726
2b	3-(1-hydroxyethyl)-2,3,6,7,8,8a-hexahydropyrrolo[1,2-a]pyrazine-1,4-dione	X1394	0.964628	137	0.0503676	0.981213	135	0.0496324	0.221351	0.179709
1	Cytidine	X1994	0.290192	58	0.0213235	0.981707	136	0.05	-0.0684569	-0.00639575
2b	N-Acetylputrescine	X0466	0.622854	99	0.0363971	0.983605	137	0.0503676	0.0200479	0.0249392
2b	Valylproline	X1623	0.422555	80	0.0294118	0.986212	138	0.0507353	0.357105	-0.0810829

## Sheet: No annotations
				DP	0.905525	1.00145	5.47402	1.51022	0.656126	2.29804	1.54456	5.74895	2.6672	7.28297	1.42271	3.17629	1.87074	4.36099	1.83301	0.482392	3.5467	2.61054	5.12362	1.36778	0.708966	2.35189	9.62944	1.32458	1.39955	1.02577	1.35471	4.26034	0.74097	2.02207	2.14405	3.02799	18.1214	3.93577	3.65266	3.57307	2.19074	2.18885	0.641414	1.87777	4.41502	7.47117	1.53536	0.979579	2.10318
				Relative precision (%)	6.49155	4.63939	6.96457	9.13259	5.558	11.6719	9.01626	2.61691	4.86669	1.72417	8.06966	3.91125	4.33379	2.11302	11.7941	8.43291	3.02965	3.79745	4.79125	19.9787	5.97864	5.81036	2.06578	18.5879	9.98253	15.6607	6.08841	2.94651	14.9509	5.17946	4.85536	4.0126	1.78425	3.18161	4.55174	3.63164	14.0418	6.53848	7.94892	6.57115	6.44619	3.55154	11.1615	11.5756	4.89771
				LOD	2498.11	840.987	413.281	1353.22	115948	39.748	181.15	27755.4	628.15	10946.2	1919.5	1369.79	848.711	5466.34	4759.55	85028.8	63710.7	1695.63	2114.14	37514.1	159.66	290.478	6490.07	5855.39	1157.73	183.112	405.401	5311.19	5583.41	10586.5	10065.5	772.346	620.067	1671.66	2696.52	3472.85	1208.67	90.116	39.0859	1134.66	111.57	9892.71	268.145	96.7429	1220.21
				RT [min]	1.201	1.216	1.334	1.121	1.165	2.094	1.911	2.974	1.129	1.126	1.126	1.119	5.648	2.377	2.657	1.172	1.313	5.663	4.57	7.61	1.2	1.201	1.132	1.269	1.122	1.117	5.643	1.106	1.177	1.131	1.089	1.106	4.578	1.107	4.447	5.023	1.39	1.114	1.166	1.126	1.136	2.845	1.845	1.199	1.086
				Molecular Weight	57.9588	59.9558	60.0325	67.975	67.9875	73.0165	80.0378	83.0373	85.0015	85.9856	86.9864	87.9831	89.0154	89.0478	89.0478	89.9694	90.0316	90.0471	90.0471	93.0341	95.9324	97.014	97.9674	97.9674	100.001	101.999	102.047	103.012	103.964	103.996	103.996	104.997	105.01	105.994	111.043	111.043	112.064	112.996	113.93	113.98	114.994	115.063	115.075	115.917	115.996
				Formula			C H4 N2 O			C2 H3 N O2		C4 H5 N O						C3 H7 N O2	C3 H7 N O2		C6 H12 O6	C7 H6	C7 H6								C8 H6						C7 H6 O2		C4 H5 N3 O	C4 H5 N3 O	C5 H8 N2 O					C5 H9 N O2	C4 H9 N3 O
				Annotation level
				Name							[Similar to: 2-Cyclopropyl-5-methyl-4,7-dihydropyrazolo[1,5-a]pyrimidin-7-one; ΔMass: 109.0524 Da]		[Similar to: N-Acetyl-L-cysteine; ΔMass: 78.0288 Da]	[Similar to: N-Acetyl-L-cysteine; ΔMass: 77.0448 Da]			[Similar to: 2,4,5-Trimethylaniline; ΔMass: 46.0894 Da]							[Similar to: 2-NP-AHD; ΔMass: 155.0204 Da]			[Similar to: Cefuroxime; ΔMass: 326.1015 Da]	[Similar to: N-Arachidonoyl taurine; ΔMass: 313.2769 Da]	[Similar to: N-Acetyl-L-cysteine; ΔMass: 63.0291 Da]		[Similar to: Citral; ΔMass: 50.0732 Da]			[Similar to: N-Acetyl-L-cysteine; ΔMass: 59.0342 Da]	[Similar to: N-Acetyl-L-cysteine; ΔMass: 59.0342 Da]							[Similar to: N-Acetyl-L-cysteine; ΔMass: 50.0340 Da]		[Similar to: N-Acetyl-L-cysteine; ΔMass: 49.0499 Da]
				Compound #	X0001	X0002	X0003	X0007	X0008	X0017	X0032	X0042	X0051	X0059	X0067	X0075	X0085	X0088	X0090	X0094	X0096	X0099	X0100	X0107	X0121	X0125	X0129	X0130	X0146	X0172	X0178	X0182	X0192	X0193	X0194	X0201	X0203	X0209	X0245	X0248	X0259	X0265	X0272	X0273	X0287	X0291	X0295	X0299	X0301
Sample #	Sample ID	Sample class		Unit	Area	Area	Area	Area	Area	Area	Area	Area	Area	Area	Area	Area	Area	Area	Area	Area	Area	Area	Area	Area	Area	Area	Area	Area	Area	Area	Area	Area	Area	Area	Area	Area	Area	Area	Area	Area	Area	Area	Area	Area	Area	Area	Area	Area	Area
CS2784	A_P1	Control			1.85777e+06	613983	68455.4	37927.9	1.63828e+06	20019	11471.2	83485	11872.2	145849	18974.2	18155.7	140174	60330.4	34305.9	1.16498e+06	3.64057e+06	19490	23060.4	518371	2.17798e+06	64974.6	440050	92029.2	30148.8	3069.56	341787	73767.6	2.24043e+06	118402	109585	13400.4	81031.8	15182.5	99708.7	21789.3	2266.53	1903.2	276.949	21512.2	1591.01	68398.2	1688.27	752108	16453.1
CS2785	A_P2	Control			1.66598e+06	549486	7172.81	31658.2	1.51393e+06	21388.4	13593.6	79958.9	10737.3	132367	18318.9	17248.7	146147	72239.7	44550.6	1.06329e+06	3.77203e+06	18184.6	20513.2	615874	2.15322e+06	62214.1	526758	83793.5	25059.4	2437.98	360592	71184	2.03314e+06	114719	106609	12445.3	108134	14605.2	124024	17949.7	4801.9	1828.44	278.249	20405.1	1874.35	77089.5	2175.67	697637	16500.8
CS2786	A_P3	Control			2.02298e+06	600025	68070.6	27419.3	1.62429e+06	25100.9	14843.1	96850.4	9102	113973	14033.9	14965.5	138791	68185.3	49482	1.14697e+06	3.46844e+06	20414.9	26313.5	436393	2.31277e+06	69981.2	763835	134470	21593.9	2102.75	335758	56791.2	2.30289e+06	93664.5	88393.2	10659.5	133192	12947.4	123481	23675.1	4311.39	1607.28	305.572	16832.4	3224.73	81481.4	2086.86	882632	14267.6
CS2787	A_P4	Control			1.87099e+06	550739	55336.7	40827.4	1.47804e+06	24586.8	14250.2	82244.4	14266.1	165420	22859.1	21530.4	137273	67777.9	56534.5	1.04842e+06	3.34642e+06	17603.1	24431.6	710440	2.04346e+06	53882.6	899700	147993	31751	3160.66	336494	90299.5	2.12998e+06	136462	129683	15874.8	133874	19047.7	134703	20640.8	3251.84	2712.36	264.916	24711.4	4030.08	76262.1	1822.21	848537	19617.1
CS2788	A_P5	Control			1.80164e+06	591635	69921.6	27349.9	1.62112e+06	19314.7	14417.1	75321.2	9437.4	113519	16108.1	14685.2	147707	71667.3	36823.2	1.16568e+06	3.46966e+06	19702	24000.4	654391	2.20894e+06	67424.2	612333	51309.8	21510.7	2165.48	349723	56493.8	2.04947e+06	105111	100886	10965.3	129481	12749.2	118586	19434.4	2215.05	1584.62	271.519	16805.5	2374.84	95817.9	1694.18	748858	13958.5
CS2789	A_P6	Control			1.83321e+06	582030	44218.3	34041.4	1.6235e+06	40848.7	12200.3	112141	11368.8	132348	16033.7	17588.9	118284	74930.3	68673.1	1.15116e+06	3.50582e+06	16147.9	13698.9	517711	2.19963e+06	59356.9	696650	113332	26184.1	2573.94	283644	72240.4	2.20156e+06	115029	109844	13021	37089.4	15662.9	139232	24469.1	2564.41	2045.28	254.001	19746.8	2742	156103	1325.62	735470	17039.7
CS2790	B_P1	SE			1.68906e+06	565271	42210.8	43078.4	1.54413e+06	39221.8	13659.5	135292	14067.1	167691	20114.8	21197.1	142156	74054.4	77983.9	1.09243e+06	3.95853e+06	17505.5	24495.3	714121	2.15128e+06	63362.3	808992	159620	33035.3	3563.88	345853	86477.3	2.32641e+06	114326	109323	16183.6	137741	17521.5	119774	21153	5697.12	2512.4	254.813	24371.7	3733.36	105144	2048.6	699921	20157.8
CS2791	B_P2	SE			1.82443e+06	546524	51912.2	36956.2	1.59353e+06	22633.1	16559.1	98696.9	13331.7	160244	21443.2	19745.1	126179	60202.1	71067.1	1.12853e+06	4.76244e+06	16901.9	19979.8	949105	1.96334e+06	72527.7	846141	117306	27737.8	2741.46	286106	82923.2	2.05713e+06	128133	118944	14759.7	105146	17729.3	136289	23401.6	3563.55	2160.92	286.007	23487.8	3285.85	79088	1789.83	863128	18421.7
CS2792	B_P3	SE			1.97066e+06	591200	40730.9	37134.4	1.63662e+06	36205.1	14531.5	113074	13276.4	156668	20274.7	21532.3	125357	74279.7	60720.5	1.17817e+06	4.7532e+06	16185	20843.1	534532	2.21031e+06	81393.1	731267	128028	28565.9	2940.71	307487	79187.7	2.23347e+06	124913	117740	14871.7	106773	19111.5	96583.3	23834.5	7240.74	2286.58	266.274	21523.7	3100.38	106383	1388.18	913572	18186.7
CS2793	B_P4	SE			1.72631e+06	569818	31772.7	38060.1	1.64672e+06	39173.1	10613.6	110088	12444.2	149604	21340.4	20522.2	113476	70977.2	78105.8	1.15823e+06	3.60637e+06	14641.8	12916	492763	2.20162e+06	44532.2	951251	122987	30255.8	3251.68	278516	81906.2	2.27982e+06	132190	124480	14679.7	59387.9	17343.1	104336	18816.7	3522.73	2213.62	290.842	22088.5	3561.3	128120	1284.87	711654	19705
CS2794	B_P5	SE			1.68845e+06	535149	35301.6	41156.2	1.69482e+06	26609.5	11401	89572.1	13489.6	164608	19432	20778.7	136713	56280.4	58861.4	1.20784e+06	3.97991e+06	18421.7	17438.6	597240	2.16394e+06	71481.8	703220	64480.9	32605.6	3405.25	339811	81792.3	2.06672e+06	126824	120757	15817.1	46872	17836.8	85621.1	20251.9	5754.47	2196.69	263.224	25016.4	2530.17	58663.2	1356.87	691431	18321.8
CS2795	B_P6	SE			1.75921e+06	591664	37215.3	41826.4	1.54454e+06	28183.2	16115.6	98616.2	14477	170706	20234	22350.4	142318	74399.9	50830.6	1.1165e+06	3.80575e+06	19897.2	23247	481894	2.32206e+06	71822.6	863653	128457	32371.4	3479.55	349148	91088	2.15697e+06	139902	129432	15829.8	123952	19348	90109.1	17730.8	4869.88	2455.52	270.31	25374.9	3757.88	86578.5	1569.88	679598	20317.9
CS2796	C_P1	LE			2.04756e+06	631809	33484.2	38592.4	1.63206e+06	26655.9	12234.6	103564	13222.5	160712	19299	19968.4	147418	71059.8	57050.3	1.17036e+06	4.33249e+06	18630.2	31876.8	578086	2.32874e+06	70019.4	889263	101681	30308.4	3015.29	364937	81713.7	2.39263e+06	124440	117342	14997.6	175337	17248.4	115136	20158.6	4220.72	2261.37	279.151	22715.3	3424.34	78258	1651.95	993008	18184.1
CS2797	C_P2	LE			1.83553e+06	564568	29330.8	36814.4	1.5888e+06	16189.1	16239.8	96760.1	12305.8	147094	20865	19058.2	129481	57140	43014	1.14529e+06	4.06004e+06	16683.2	23784.1	637751	2.15333e+06	70801.3	725334	96815.6	28599.3	3003.4	315388	78564.9	2.21986e+06	120095	114203	14309.2	127284	17474.4	75543.2	15620.4	4269.43	2098.15	262.141	21655.4	2878.41	56771.8	1483.09	845705	18296.8
CS2798	C_P3	LE			1.80397e+06	554765	21210.9	28716.1	1.52125e+06	24452.1	15532.8	91623.6	10493.1	119997	18425.8	17073.6	155207	71171.5	52955.6	1.07338e+06	3.74982e+06	20333.2	33696.2	511561	2.34505e+06	68613.2	983516	121856	21562.3	2364.33	350467	68624.2	2.10091e+06	103596	96569.3	12468.5	188429	14880.4	101294	20510.3	3385.66	1835.14	290.638	18172.9	4791	83663.9	1402.91	843733	16600.5
CS2799	C_P4	LE			1.76208e+06	605488	26699.8	40233.8	1.58216e+06	23984.7	11557.9	113108	13277.4	141723	20852.5	18696.6	142573	74077.5	66264.3	1.12746e+06	4.55751e+06	19155.8	21171.3	781635	2.23987e+06	55958.9	704747	142592	30823.9	2788.61	350736	75613.2	1.53732e+06	109389	101574	14846.4	114197	17034.4	120757	21759.3	6324.63	2200.59	288.314	22158.8	2787.49	85951	1446.62	750979	19222.3
CS2800	C_P5	LE			1.79086e+06	585606	28636.2	33478.4	1.63774e+06	25469.8	14361.9	125085	11758.4	144509	16984.9	18310.4	121172	62365.8	59193.9	1.18277e+06	4.15252e+06	14543	12244.8	572127	2.15417e+06	53075.9	1.11476e+06	102175	25935.4	2624.82	295836	71289.6	2.11868e+06	120120	113562	13501.5	79249.5	15857.9	125161	24488.5	3425.73	2098.1	275.273	21305.6	5772.33	97916	1438.4	764658	17883.2
CS2801	C_P6	LE			1.76538e+06	603295	42603.9	30645.6	1.60304e+06	43215.9	11492	123792	10439.4	121378	16890.4	15121	125064	63760.9	60504	1.14624e+06	3.81659e+06	15597	16347.4	451903	2.18085e+06	73260.8	857784	106516	23755.9	2271.82	300464	65717.8	1.53465e+06	100328	95257.6	11526.5	87134.1	13536.1	153972	26078.8	5560.32	1736.29	267.405	17884.4	4137.12	116143	1489.85	705421	15629.2
[truncated: 566 more columns]
