# Supplementary material for: Multiomics Provide Insights into the Key Molecules and Pathways Involved in the Physiological Adaptation of Atlantic Salmon (Salmo salar) to Chemotherapeutic-Induced Oxidative Stress
Source: Antioxidants (Basel). 2021 Nov 30;10(12):1931. doi: 10.3390/antiox10121931 (PMC8750430; doi:10.3390/antiox10121931)
Supplement: Supplementary file 1 [file antioxidants-10-01931-s001.zip › Table S2. D rerio proteins.xlsx]

## Sheet: Skin mucus proteomics 
Accession.Number	Identified.Proteins..3332.3333.	Entry	Entry.name	Status	Protein.names	Gene.names	Organism	Length	Gene.ontology..biological.process.	Gene.ontology..cellular.component.	Gene.ontology..GO.	Gene.ontology..molecular.function.	Gene.ontology.IDs	Tissue.specificity	Cross.reference..KEGG.	Protein.families	Motif	Pathway	X15.m	X30.m	cluster	p.value	post.hoc	cor.1.3	VENN.group	drerio.homolog
NP_001117081.1	Cluster of macrophage migration inhibitory factor [Salmo salar] (NP_001117081.1)	Q0ZBS0	Q0ZBS0_SALSA	unreviewed	Macrophage migration inhibitory factor (EC 5.3.2.1)	MIF LOC100136498 mif	Salmo salar (Atlantic salmon)	114			phenylpyruvate tautomerase activity [GO:0050178]	phenylpyruvate tautomerase activity [GO:0050178]	GO:0050178		sasa:100136498;	MIF family			0.952133	0.378454	2	0.0122151	b,a,ab	0.209437	15min	NP_001036786.1
NP_001133113.1	26S protease regulatory subunit 7 [Salmo salar]	B5DG36	B5DG36_SALSA	unreviewed	26S proteasome AAA-ATPase subunit RPT1 (26S proteasome regulatory subunit 7) (Proteasome 26S subunit ATPase 2)	psmc2 LOC106594128 LOC106609683 PRS7	Salmo salar (Atlantic salmon)	434	protein catabolic process [GO:0030163]	cytoplasm [GO:0005737]	cytoplasm [GO:0005737]; ATP binding [GO:0005524]; peptidase activity [GO:0008233]; proteasome-activating ATPase activity [GO:0036402]; protein catabolic process [GO:0030163]	ATP binding [GO:0005524]; peptidase activity [GO:0008233]; proteasome-activating ATPase activity [GO:0036402]	GO:0005524; GO:0005737; GO:0008233; GO:0030163; GO:0036402		sasa:100194555;sasa:106594128;sasa:106609683;	AAA ATPase family			0.56746	-0.0525116	2	0.0225954	b,a,b	-0.0389355	15min	NP_957260.1
NP_001133150.1	ATP synthase subunit gamma, mitochondrial [Salmo salar]	B5DGC9	B5DGC9_SALSA	unreviewed	ATP synthase subunit gamma	atp5c1 ATPG	Salmo salar (Atlantic salmon)	293	ATP synthesis coupled proton transport [GO:0015986]	proton-transporting ATP synthase complex, catalytic core F(1) [GO:0045261]	proton-transporting ATP synthase complex, catalytic core F(1) [GO:0045261]; proton-transporting ATP synthase activity, rotational mechanism [GO:0046933]; ATP synthesis coupled proton transport [GO:0015986]	proton-transporting ATP synthase activity, rotational mechanism [GO:0046933]	GO:0015986; GO:0045261; GO:0046933		sasa:100194592;	ATPase gamma chain family			0.687784	0.226975	2	0.0389286	b,a,ab	0.160195	15min	AAH60917.1
NP_001133168.1	60S ribosomal protein L38 [Salmo salar]	B5DGJ3	B5DGJ3_SALSA	unreviewed	60S ribosomal protein L38	rpl38 RL38	Salmo salar (Atlantic salmon)	70	translation [GO:0006412]	ribosome [GO:0005840]	ribosome [GO:0005840]; structural constituent of ribosome [GO:0003735]; translation [GO:0006412]	structural constituent of ribosome [GO:0003735]	GO:0003735; GO:0005840; GO:0006412		sasa:100194611;	Eukaryotic ribosomal protein eL38 family			-0.535883	-0.319244	1	0.0155507	b,a,ab	-0.412267	15min	NP_001002486.1
NP_001133818.1	Cluster of apoptosis inhibitor 5 [Salmo salar] (NP_001133818.1)	B5X3S1	B5X3S1_SALSA	unreviewed	apoptosis inhibitor 5	API5 api5	Salmo salar (Atlantic salmon)	530							sasa:100195317;	API5 family			0.587859	0.509758	2	0.0343549	b,a,ab	0.471415	15min	NP_955834.2
NP_001134251.1	Cathepsin M precursor [Salmo salar]	Q70SU8	Q70SU8_SALSA	unreviewed	Cathepsin M (Cathepsin M precursor) (Cystein proteinase inhibitor protein)	salarin CATM catm	Salmo salar (Atlantic salmon)	342		cell [GO:0005623]; cytoplasm [GO:0005737]; extracellular space [GO:0005615]; vacuole [GO:0005773]	cell [GO:0005623]; cytoplasm [GO:0005737]; extracellular space [GO:0005615]; vacuole [GO:0005773]; cysteine-type endopeptidase inhibitor activity [GO:0004869]; protease binding [GO:0002020]	cysteine-type endopeptidase inhibitor activity [GO:0004869]; protease binding [GO:0002020]	GO:0002020; GO:0004869; GO:0005615; GO:0005623; GO:0005737; GO:0005773		sasa:100195750;				0.910148	-0.288527	1	0.00817165	b,a,b	-0.109909	15min	NP_001002368.1
NP_001134252.1	60S ribosomal protein L14 [Salmo salar]	B5X7I1	B5X7I1_SALSA	unreviewed	60S ribosomal protein L14	RL14 rl14	Salmo salar (Atlantic salmon)	138	translation [GO:0006412]	ribosome [GO:0005840]	ribosome [GO:0005840]; RNA binding [GO:0003723]; structural constituent of ribosome [GO:0003735]; translation [GO:0006412]	RNA binding [GO:0003723]; structural constituent of ribosome [GO:0003735]	GO:0003723; GO:0003735; GO:0005840; GO:0006412		sasa:100195751;	Eukaryotic ribosomal protein eL14 family			0.581301	0.471181	2	0.0202612	b,a,ab	0.471839	15min	AAI53437.1
NP_001134776.1	Hemagglutinin/amebocyte aggregation factor [Salmo salar]	B5XDB4	B5XDB4_SALSA	unreviewed	Hemagglutinin/amebocyte aggregation factor	HAAF haaf	Salmo salar (Atlantic salmon)	224		integral component of membrane [GO:0016021]	integral component of membrane [GO:0016021]		GO:0016021		sasa:100196275;	Dermatopontin family			1.33176	1.20987	4	0.0253806	b,a,ab	0.496257	15min	NP_001038304.2
NP_001134815.1	14-3-3 protein zeta [Salmo salar]	B5XDU3	B5XDU3_SALSA	unreviewed	14-3-3 protein zeta	1433Z 1433z	Salmo salar (Atlantic salmon)	245							sasa:100196314;	14-3-3 family			0.353719	0.230834	2	0.0359958	b,a,ab	0.369873	15min	NP_958892.1
NP_001135000.1	S-formylglutathione hydrolase [Salmo salar]	B5XG47	B5XG47_SALSA	unreviewed	S-formylglutathione hydrolase (EC 3.1.2.12)	ESTD estd	Salmo salar (Atlantic salmon)	282	formaldehyde catabolic process [GO:0046294]	cytoplasm [GO:0005737]	cytoplasm [GO:0005737]; carboxylic ester hydrolase activity [GO:0052689]; S-formylglutathione hydrolase activity [GO:0018738]; formaldehyde catabolic process [GO:0046294]	carboxylic ester hydrolase activity [GO:0052689]; S-formylglutathione hydrolase activity [GO:0018738]	GO:0005737; GO:0018738; GO:0046294; GO:0052689		sasa:100196499;	Esterase D family			2.87945	2.19218	4	0.00858587	b,a,ab	0.383817	15min	NP_001017796.1
NP_001135205.1	Cluster of Rab GDP dissociation inhibitor beta [Salmo salar] (NP_001135205.1)	B5X1S6	B5X1S6_SALSA	unreviewed	Rab GDP dissociation inhibitor	GDIB gdib	Salmo salar (Atlantic salmon)	448	protein transport [GO:0015031]; small GTPase mediated signal transduction [GO:0007264]	cytoplasm [GO:0005737]; extracellular exosome [GO:0070062]	cytoplasm [GO:0005737]; extracellular exosome [GO:0070062]; GTPase activator activity [GO:0005096]; Rab GDP-dissociation inhibitor activity [GO:0005093]; protein transport [GO:0015031]; small GTPase mediated signal transduction [GO:0007264]	GTPase activator activity [GO:0005096]; Rab GDP-dissociation inhibitor activity [GO:0005093]	GO:0005093; GO:0005096; GO:0005737; GO:0007264; GO:0015031; GO:0070062		sasa:100196711;	Rab GDI family			0.485104	0.328901	2	0.0123584	b,a,ab	0.421045	15min	AAH73176.1
NP_001265971.1	Cluster of eukaryotic translation initiation factor 5A -1 [Salmo salar] (NP_001265971.1)	B5DGQ3	B5DGQ3_SALSA	unreviewed	Eukaryotic translation initiation factor 5A (eIF-5A)	LOC101448018 IF5A1	Salmo salar (Atlantic salmon)	157	positive regulation of translational elongation [GO:0045901]; positive regulation of translational termination [GO:0045905]; translational frameshifting [GO:0006452]		ribosome binding [GO:0043022]; translation elongation factor activity [GO:0003746]; translation initiation factor activity [GO:0003743]; positive regulation of translational elongation [GO:0045901]; positive regulation of translational termination [GO:0045905]; translational frameshifting [GO:0006452]	ribosome binding [GO:0043022]; translation elongation factor activity [GO:0003746]; translation initiation factor activity [GO:0003743]	GO:0003743; GO:0003746; GO:0006452; GO:0043022; GO:0045901; GO:0045905		sasa:101448018;	EIF-5A family			0.403961	0.0505234	2	0.0257022	b,a,ab	0.06251	15min	NP_998350.1
Q2M2I5	SWISS-PROT:Q2M2I5 Tax_Id=9606 Gene_Symbol=KRT24 Keratin, type I cytoskeletal 24	Q2M2I5	K1C24_HUMAN	reviewed	Keratin, type I cytoskeletal 24 (Cytokeratin-24) (CK-24) (Keratin-24) (K24) (Type I keratin-24)	KRT24 KA24	Homo sapiens (Human)	525	cornification [GO:0070268]; keratinization [GO:0031424]	cytosol [GO:0005829]; extracellular exosome [GO:0070062]; intermediate filament [GO:0005882]	cytosol [GO:0005829]; extracellular exosome [GO:0070062]; intermediate filament [GO:0005882]; structural molecule activity [GO:0005198]; cornification [GO:0070268]; keratinization [GO:0031424]	structural molecule activity [GO:0005198]	GO:0005198; GO:0005829; GO:0005882; GO:0031424; GO:0070062; GO:0070268	TISSUE SPECIFICITY: Highly expressed in keratinocytes, placenta, colon and spleen. Expressed at lower level in thymus and testis. {ECO:0000269|PubMed:12230514}.	hsa:192666;	Intermediate filament family	NA	NA	0.700883	-0.558576	1	0.00377222	b,a,b	-0.241569	15min
XP_013979148.1	PREDICTED: sodium/potassium-transporting ATPase subunit beta-233-like [Salmo salar]	C0HAG9	C0HAG9_SALSA	unreviewed	Sodium/potassium-transporting ATPase subunit beta	AT233 LOC106560620	Salmo salar (Atlantic salmon)	304	potassium ion transport [GO:0006813]; sodium ion transport [GO:0006814]	sodium:potassium-exchanging ATPase complex [GO:0005890]	sodium:potassium-exchanging ATPase complex [GO:0005890]; potassium ion transport [GO:0006813]; sodium ion transport [GO:0006814]		GO:0005890; GO:0006813; GO:0006814		sasa:106560620;	X(+)/potassium ATPases subunit beta family			1.08513	-1.19656	1	0.00438203	b,a,b	-0.235815	15min	AAH45376.1
XP_013980493.1	Cluster of PREDICTED: peptidyl-prolyl cis-trans isomerase FKBP4 [Salmo salar] (XP_013980493.1)	A0A1S3KP87	A0A1S3KP87_SALSA	unreviewed	Peptidylprolyl isomerase (EC 5.2.1.8)	fkbp4	Salmo salar (Atlantic salmon)	443			FK506 binding [GO:0005528]; heat shock protein binding [GO:0031072]; peptidyl-prolyl cis-trans isomerase activity [GO:0003755]	FK506 binding [GO:0005528]; heat shock protein binding [GO:0031072]; peptidyl-prolyl cis-trans isomerase activity [GO:0003755]	GO:0003755; GO:0005528; GO:0031072		sasa:106561259;				0.762208	0.135553	2	0.0233175	b,a,ab	0.0820974	15min	XP_005173673.1
XP_013981932.1	PREDICTED: CD59 glycoprotein [Salmo salar]	B5XCG2	B5XCG2_SALSA	unreviewed	CD59 glycoprotein	CD59 cd59	Salmo salar (Atlantic salmon)	118	defense response to Gram-negative bacterium [GO:0050829]; defense response to Gram-positive bacterium [GO:0050830]	membrane [GO:0016020]	membrane [GO:0016020]; lipopolysaccharide binding [GO:0001530]; lipoteichoic acid binding [GO:0070891]; defense response to Gram-negative bacterium [GO:0050829]; defense response to Gram-positive bacterium [GO:0050830]	lipopolysaccharide binding [GO:0001530]; lipoteichoic acid binding [GO:0070891]	GO:0001530; GO:0016020; GO:0050829; GO:0050830; GO:0070891		sasa:106561964;				1.45244	0.976863	4	0.0178309	b,a,ab	0.358538	15min	NP_001313314.1
XP_013987347.1	Cluster of PREDICTED: 60S ribosomal protein L10a [Salmo salar] (XP_013987347.1)	B5DGV1	B5DGV1_SALSA	unreviewed	Ribosomal protein	RL10A LOC106565120	Salmo salar (Atlantic salmon)	216	translation [GO:0006412]	large ribosomal subunit [GO:0015934]	large ribosomal subunit [GO:0015934]; RNA binding [GO:0003723]; structural constituent of ribosome [GO:0003735]; translation [GO:0006412]	RNA binding [GO:0003723]; structural constituent of ribosome [GO:0003735]	GO:0003723; GO:0003735; GO:0006412; GO:0015934		sasa:106565120;	Universal ribosomal protein uL1 family			0.528626	0.376198	2	0.0310278	b,a,ab	0.401874	15min	NP_955930.1
XP_013988048.1	PREDICTED: SAP domain-containing ribonucleoprotein-like isoform X1 [Salmo salar]	B5X8Q7	B5X8Q7_SALSA	unreviewed	Nuclear protein Hcc-1 (SAP domain-containing ribonucleoprotein-like isoform X1)	HCC1 LOC106565436	Salmo salar (Atlantic salmon)	212							sasa:106565436;				-1.45023	-0.844111	3	0.0142549	b,a,ab	-0.447885	15min	NP_001019578.1
XP_013989714.1	Cluster of PREDICTED: ubiquitin-like modifier-activating enzyme 1 [Salmo salar] (XP_013989714.1)	A0A1S3LGR3	A0A1S3LGR3_SALSA	unreviewed	ubiquitin-like modifier-activating enzyme 1	uba1	Salmo salar (Atlantic salmon)	1050	cellular protein modification process [GO:0006464]		ATP binding [GO:0005524]; ubiquitin-like modifier activating enzyme activity [GO:0008641]; cellular protein modification process [GO:0006464]	ATP binding [GO:0005524]; ubiquitin-like modifier activating enzyme activity [GO:0008641]	GO:0005524; GO:0006464; GO:0008641		sasa:106566326;	Ubiquitin-activating E1 family		PATHWAY: Protein modification; protein ubiquitination. {ECO:0000256|ARBA:ARBA00004906}.	0.673521	0.611904	2	0.0304491	b,a,ab	0.494383	15min	XP_005162108.1
XP_013990162.1	Cluster of PREDICTED: deoxynucleoside triphosphate triphosphohydrolase SAMHD1 isoform X2 [Salmo salar] (XP_013990162.1)	A0A1S3LGT9	A0A1S3LGT9_SALSA	unreviewed	Deoxynucleoside triphosphate triphosphohydrolase SAMHD1	samhd1	Salmo salar (Atlantic salmon)	697			hydrolase activity [GO:0016787]	hydrolase activity [GO:0016787]	GO:0016787			SAMHD1 family			1.04046	-0.352694	1	0.00347165	b,a,b	-0.115847	15min	XP_009294826.1
XP_013999349.1	PREDICTED: enhancer of rudimentary homolog [Salmo salar]	B5X283	B5X283_SALSA	unreviewed	Enhancer of rudimentary homolog	ERH LOC106571145 LOC106611428	Salmo salar (Atlantic salmon)	104	cell cycle [GO:0007049]		cell cycle [GO:0007049]		GO:0007049		sasa:106571145;sasa:106611428;	E(R) family			1.3022	0.44728	2	0.00127123	b,a,b	0.182683	15min	NP_001258746.1
XP_014000301.1	Cluster of PREDICTED: heterogeneous nuclear ribonucleoprotein U-like [Salmo salar] (XP_014000301.1)	A0A1S3MBG6	A0A1S3MBG6_SALSA	unreviewed	heterogeneous nuclear ribonucleoprotein U-like	LOC106571586	Salmo salar (Atlantic salmon)	836		nucleus [GO:0005634]	nucleus [GO:0005634]		GO:0005634		sasa:106571586;				1.11341	0.689632	2	0.00599546	b,a,ab	0.370224	15min	AAI17609.1
XP_014006214.1	Cluster of PREDICTED: sodium/potassium-transporting ATPase subunit alpha-1 [Salmo salar] (XP_014006214.1)	A0A1S3MSS7	A0A1S3MSS7_SALSA	unreviewed	Sodium/potassium-transporting ATPase subunit alpha	LOC106574724	Salmo salar (Atlantic salmon)	1025		integral component of membrane [GO:0016021]	integral component of membrane [GO:0016021]; ATP binding [GO:0005524]; metal ion binding [GO:0046872]; potassium transmembrane transporter activity, phosphorylative mechanism [GO:0008556]	ATP binding [GO:0005524]; metal ion binding [GO:0046872]; potassium transmembrane transporter activity, phosphorylative mechanism [GO:0008556]	GO:0005524; GO:0008556; GO:0016021; GO:0046872		sasa:106574724;	Cation transport ATPase (P-type) (TC 3.A.3) family, Type IIC subfamily			0.754391	-0.0285115	2	0.0245341	b,a,b	-0.0151869	15min	NP_571765.1
XP_014006425.1	Cluster of PREDICTED: copine-4 isoform X1 [Salmo salar] (XP_014006425.1)	A0A1S3MTJ4	A0A1S3MTJ4_SALSA	unreviewed	copine-4 isoform X1	LOC106574842	Salmo salar (Atlantic salmon)	553							sasa:106574842;	Copine family			3.70521	3.47231	5	0.0403433	b,a,ab	0.460861	15min	XP_003200619.1
XP_014007832.1	Cluster of PREDICTED: importin-5 [Salmo salar] (XP_014007832.1)	A0A1S3MXD1	A0A1S3MXD1_SALSA	unreviewed	importin-5	ipo5	Salmo salar (Atlantic salmon)	1093	protein import into nucleus [GO:0006606]		protein import into nucleus [GO:0006606]		GO:0006606		sasa:106575708;				1.26483	0.147071	2	0.0249398	b,a,ab	0.0428422	15min	XP_009303669.1
XP_014009514.1	PREDICTED: uncharacterized protein LOC106576710 [Salmo salar]	A0A1S3N213	A0A1S3N213_SALSA	unreviewed	uncharacterized protein LOC106576710	LOC106576710	Salmo salar (Atlantic salmon)	129							sasa:106576710;				-0.510159	0.109003	2	0.00321495	b,a,b	0.144544	15min
XP_014011440.1	Cluster of PREDICTED: IgGFc-binding protein-like [Salmo salar] (XP_014011440.1)	A0A1S3N816	A0A1S3N816_SALSA	unreviewed	IgGFc-binding protein-like	LOC106577653	Salmo salar (Atlantic salmon)	2218							sasa:106577653;				0.702084	0.620488	2	0.0210114	b,a,ab	0.50279	15min	XP_017211776.2
XP_014011820.1	Cluster of PREDICTED: eukaryotic initiation factor 4A-I [Salmo salar] (XP_014011820.1)	A0A1S3N962	A0A1S3N962_SALSA	unreviewed	RNA helicase (EC 3.6.4.13)	LOC106577905 LOC106608954	Salmo salar (Atlantic salmon)	407			ATP binding [GO:0005524]; helicase activity [GO:0004386]; translation initiation factor activity [GO:0003743]	ATP binding [GO:0005524]; helicase activity [GO:0004386]; translation initiation factor activity [GO:0003743]	GO:0003743; GO:0004386; GO:0005524		sasa:106577905;sasa:106608954;	DEAD box helicase family	MOTIF 33..61; /note=Q motif; /evidence=ECO:0000256|PROSITE-ProRule:PRU00552		0.418408	0.062599	2	0.0176448	b,a,b	0.0782584	15min	NP_958918.1
XP_014012131.1	PREDICTED: N-acetyl-D-glucosamine kinase isoform X1 [Salmo salar]	A0A1S3NAJ3	A0A1S3NAJ3_SALSA	unreviewed	GlcNAc kinase (EC 2.7.1.59) (N-acetyl-D-glucosamine kinase)	nagk	Salmo salar (Atlantic salmon)	350			N-acetylglucosamine kinase activity [GO:0045127]	N-acetylglucosamine kinase activity [GO:0045127]	GO:0045127		sasa:106578076;	Eukaryotic-type N-acetylglucosamine kinase family			-1.15868	-0.598054	3	0.00777331	b,a,ab	-0.420729	15min	XP_005166603.1
XP_014019416.1	Cluster of PREDICTED: actin-related protein 3-like [Salmo salar] (XP_014019416.1)	A0A1S3NVZ4	A0A1S3NVZ4_SALSA	unreviewed	actin-related protein 3-like	LOC106581699	Salmo salar (Atlantic salmon)	414	Arp2/3 complex-mediated actin nucleation [GO:0034314]	Arp2/3 protein complex [GO:0005885]	Arp2/3 protein complex [GO:0005885]; ATP binding [GO:0005524]; Arp2/3 complex-mediated actin nucleation [GO:0034314]	ATP binding [GO:0005524]	GO:0005524; GO:0005885; GO:0034314		sasa:106581699;	Actin family			0.50838	0.125867	2	0.0131226	b,a,ab	0.13583	15min	NP_001003944.1
XP_014019674.1	Cluster of PREDICTED: glycerol-3-phosphate dehydrogenase, mitochondrial isoform X1 [Salmo salar] (XP_014019674.1)	A0A1S3NWC0	A0A1S3NWC0_SALSA	unreviewed	Glycerol-3-phosphate dehydrogenase, mitochondrial	gpd2	Salmo salar (Atlantic salmon)	739	glycerol-3-phosphate metabolic process [GO:0006072]	glycerol-3-phosphate dehydrogenase complex [GO:0009331]	glycerol-3-phosphate dehydrogenase complex [GO:0009331]; calcium ion binding [GO:0005509]; glycerol-3-phosphate dehydrogenase (quinone) activity [GO:0004368]; glycerol-3-phosphate metabolic process [GO:0006072]	calcium ion binding [GO:0005509]; glycerol-3-phosphate dehydrogenase (quinone) activity [GO:0004368]	GO:0004368; GO:0005509; GO:0006072; GO:0009331		sasa:106581822;	FAD-dependent glycerol-3-phosphate dehydrogenase family			1.69188	1.3401	4	0.0378363	b,a,ab	0.399225	15min	XP_005165900.1
XP_014020727.1	Cluster of PREDICTED: ras-related protein Ral-B-like [Salmo salar] (XP_014020727.1)	A0A1S3NZC4	A0A1S3NZC4_SALSA	unreviewed	ras-related protein Ral-B-like	LOC106582302	Salmo salar (Atlantic salmon)	208	Ras protein signal transduction [GO:0007265]	plasma membrane [GO:0005886]	plasma membrane [GO:0005886]; GTP binding [GO:0005525]; GTPase activity [GO:0003924]; Ras protein signal transduction [GO:0007265]	GTPase activity [GO:0003924]; GTP binding [GO:0005525]	GO:0003924; GO:0005525; GO:0005886; GO:0007265		sasa:106582302;	Small GTPase superfamily, Ras family			2.13543	1.50043	4	0.0384117	b,a,ab	0.319687	15min	NP_001003649.1
XP_014021145.1	Cluster of PREDICTED: interferon-induced guanylate-binding protein 1-like [Salmo salar] (XP_014021145.1)	A0A1S3P0S8	A0A1S3P0S8_SALSA	unreviewed	interferon-induced guanylate-binding protein 1-like	LOC106582502	Salmo salar (Atlantic salmon)	629			GTP binding [GO:0005525]; GTPase activity [GO:0003924]	GTPase activity [GO:0003924]; GTP binding [GO:0005525]	GO:0003924; GO:0005525		sasa:106582502;	TRAFAC class dynamin-like GTPase superfamily, GB1/RHD3-type GTPase family, GB1 subfamily			-0.219945	-0.0907194	2	0.0303609	b,a,ab	-0.262212	15min	NP_001002343.1
XP_014022332.1	PREDICTED: interferon regulatory factor 6-like [Salmo salar]	A0A1S3P407	A0A1S3P407_SALSA	unreviewed	interferon regulatory factor 6-like	LOC106583071	Salmo salar (Atlantic salmon)	487			DNA-binding transcription factor activity [GO:0003700]	DNA-binding transcription factor activity [GO:0003700]	GO:0003700		sasa:106583071;				1.28451	0.0756177	2	0.0277104	b,a,ab	0.0203779	15min	NP_956892.1
XP_014022387.1	Cluster of PREDICTED: F-actin-capping protein subunit beta isoform X2 [Salmo salar] (XP_014022387.1)	A0A1S3P463	A0A1S3P463_SALSA	unreviewed	F-actin-capping protein subunit beta	LOC106583096	Salmo salar (Atlantic salmon)	272	actin cytoskeleton organization [GO:0030036]; barbed-end actin filament capping [GO:0051016]	cytoplasm [GO:0005737]; F-actin capping protein complex [GO:0008290]	cytoplasm [GO:0005737]; F-actin capping protein complex [GO:0008290]; actin binding [GO:0003779]; actin cytoskeleton organization [GO:0030036]; barbed-end actin filament capping [GO:0051016]	actin binding [GO:0003779]	GO:0003779; GO:0005737; GO:0008290; GO:0030036; GO:0051016			F-actin-capping protein beta subunit family			0.454747	0.23018	2	0.019862	b,a,ab	0.297596	15min	NP_956229.1
XP_014030362.1	Cluster of PREDICTED: serine/threonine-protein phosphatase 2A catalytic subunit beta isoform-like [Salmo salar] (XP_014030362.1)	B5X934	B5X934_SALSA	unreviewed	Serine/threonine-protein phosphatase (EC 3.1.3.16)	PP2AB LOC106587035	Salmo salar (Atlantic salmon)	309			phosphoprotein phosphatase activity [GO:0004721]	phosphoprotein phosphatase activity [GO:0004721]	GO:0004721		sasa:106587035;	PPP phosphatase family			0.665926	0.572716	2	0.0437305	b,a,ab	0.453316	15min	NP_998458.1
XP_014032237.1	PREDICTED: THO complex subunit 4-like [Salmo salar]	A0A1S3PX27	A0A1S3PX27_SALSA	unreviewed	THO complex subunit 4-like	LOC106588091	Salmo salar (Atlantic salmon)	274			RNA binding [GO:0003723]	RNA binding [GO:0003723]	GO:0003723		sasa:106588091;				0.615029	0.267392	2	0.0180335	b,a,ab	0.244421	15min	NP_001098578.1
XP_014032686.1	Cluster of PREDICTED: acidic leucine-rich nuclear phosphoprotein 32 family member E [Salmo salar] (XP_014032686.1)	A0A1S3PYI5	A0A1S3PYI5_SALSA	unreviewed	acidic leucine-rich nuclear phosphoprotein 32 family member E	LOC106588334	Salmo salar (Atlantic salmon)	245							sasa:106588334;				-0.396811	0.170275	2	0.00162495	b,a,b	0.2556	15min	NP_998442.1
XP_014033173.1	Cluster of PREDICTED: hepatoma-derived growth factor-like isoform X1 [Salmo salar] (XP_014033173.1)	A0A1S3PZP1	A0A1S3PZP1_SALSA	unreviewed	hepatoma-derived growth factor-like isoform X1	LOC106588564	Salmo salar (Atlantic salmon)	224							sasa:106588564;				2.17325	1.55043	4	0.0233636	b,a,ab	0.344372	15min	NP_001012372.1
XP_014037545.1	PREDICTED: tumor protein D52-like [Salmo salar]	A0A1S3QC23	A0A1S3QC23_SALSA	unreviewed	tumor protein D52-like	LOC106590894	Salmo salar (Atlantic salmon)	193							sasa:106590894;	TPD52 family			1.35336	0.655368	2	0.0256982	b,a,ab	0.227256	15min	NP_001038486.1
XP_014045498.1	Cluster of PREDICTED: calponin-2-like [Salmo salar] (XP_014045498.1)	B5X3R8	B5X3R8_SALSA	unreviewed	Calponin	CNN2 LOC106598989	Salmo salar (Atlantic salmon)	318	actomyosin structure organization [GO:0031032]		actin binding [GO:0003779]; calmodulin binding [GO:0005516]; actomyosin structure organization [GO:0031032]	actin binding [GO:0003779]; calmodulin binding [GO:0005516]	GO:0003779; GO:0005516; GO:0031032		sasa:106598989;	Calponin family			0.746586	-0.0586276	2	0.018877	b,a,b	-0.0316491	15min	AAZ14863.1
XP_014055656.1	Cluster of PREDICTED: ubiquitin carboxyl-terminal hydrolase 5 isoform X2 [Salmo salar] (XP_014055656.1)	A0A1S3RTN2	A0A1S3RTN2_SALSA	unreviewed	Ubiquitin carboxyl-terminal hydrolase (EC 3.4.19.12)	ubp5	Salmo salar (Atlantic salmon)	834	protein deubiquitination [GO:0016579]; ubiquitin-dependent protein catabolic process [GO:0006511]		thiol-dependent ubiquitin-specific protease activity [GO:0004843]; zinc ion binding [GO:0008270]; protein deubiquitination [GO:0016579]; ubiquitin-dependent protein catabolic process [GO:0006511]	thiol-dependent ubiquitin-specific protease activity [GO:0004843]; zinc ion binding [GO:0008270]	GO:0004843; GO:0006511; GO:0008270; GO:0016579			Peptidase C19 family			0.916236	0.363571	2	0.0452341	b,a,ab	0.184067	15min	AAH66694.1
XP_014057694.1	PREDICTED: RNA-binding protein cabeza-like [Salmo salar]	A0A1S3S0N2	A0A1S3S0N2_SALSA	unreviewed	RNA-binding protein cabeza-like	LOC106606097	Salmo salar (Atlantic salmon)	136							sasa:106606097;				0.607176	0.492781	2	0.0245656	b,a,ab	0.462611	15min
XP_014062185.1	PREDICTED: rap1 GTPase-GDP dissociation stimulator 1-like isoform X1 [Salmo salar]	A0A1S3SCW5	A0A1S3SCW5_SALSA	unreviewed	rap1 GTPase-GDP dissociation stimulator 1-like isoform X1	LOC106608640	Salmo salar (Atlantic salmon)	608			GTPase activator activity [GO:0005096]	GTPase activator activity [GO:0005096]	GO:0005096		sasa:106608640;				1.62224	1.32541	4	0.0149167	b,a,ab	0.459489	15min	XP_021333729.1
XP_014062561.1	Cluster of PREDICTED: actin-related protein 2-like [Salmo salar] (XP_014062561.1)	A0A1S3SDZ4	A0A1S3SDZ4_SALSA	unreviewed	actin-related protein 2-like	LOC106608890	Salmo salar (Atlantic salmon)	394							sasa:106608890;	Actin family			2.25673	1.0561	4	0.0189904	b,a,ab	0.177626	15min	NP_001007773.1
XP_014068103.1	Cluster of PREDICTED: heterogeneous nuclear ribonucleoprotein A/B-like isoform X1 [Salmo salar] (XP_014068103.1)	B5X3L9	B5X3L9_SALSA	unreviewed	Heterogeneous nuclear ribonucleoprotein A/B (heterogeneous nuclear ribonucleoprotein A/B-like isoform X1)	ROAA LOC106611940	Salmo salar (Atlantic salmon)	348			RNA binding [GO:0003723]	RNA binding [GO:0003723]	GO:0003723		sasa:106611940;				0.399326	0.113523	2	0.0208095	b,a,ab	0.156956	15min	NP_997752.2
NP_001135164.1	adenosine kinase a [Salmo salar]	B5DGF0	B5DGF0_SALSA	unreviewed	Adenosine kinase (EC 2.7.1.20)	LOC100196663	Salmo salar (Atlantic salmon)	384	purine ribonucleoside salvage [GO:0006166]		adenosine kinase activity [GO:0004001]; purine ribonucleoside salvage [GO:0006166]	adenosine kinase activity [GO:0004001]	GO:0004001; GO:0006166		sasa:100196663;	Carbohydrate kinase PfkB family; Carbohydrate kinase pfkB family		PATHWAY: Purine metabolism; AMP biosynthesis via salvage pathway; AMP from adenosine: step 1/1. {ECO:0000256|ARBA:ARBA00004801}.	1.0005	0.886189	2	0.00603785	b,a,a	0.552931	15min and 30min	NP_997956.1
NP_001135357.1	alpha-endosulfine [Salmo salar]	B5XE27	ENSA_SALSA	reviewed	Alpha-endosulfine	ensa	Salmo salar (Atlantic salmon)	115	cell division [GO:0051301]; G2/M transition of mitotic cell cycle [GO:0000086]; mitotic cell cycle [GO:0000278]	cytoplasm [GO:0005737]	cytoplasm [GO:0005737]; phosphatase inhibitor activity [GO:0019212]; protein phosphatase 2A binding [GO:0051721]; protein phosphatase inhibitor activity [GO:0004864]; protein phosphatase regulator activity [GO:0019888]; cell division [GO:0051301]; G2/M transition of mitotic cell cycle [GO:0000086]; mitotic cell cycle [GO:0000278]	phosphatase inhibitor activity [GO:0019212]; protein phosphatase 2A binding [GO:0051721]; protein phosphatase inhibitor activity [GO:0004864]; protein phosphatase regulator activity [GO:0019888]	GO:0000086; GO:0000278; GO:0004864; GO:0005737; GO:0019212; GO:0019888; GO:0051301; GO:0051721		sasa:100196863;sasa:106580912;	Endosulfine family			-0.699758	-2.56773	3	5.08e-05	c,a,b	-0.854995	15min and 30min	NP_001243660.1
XP_013981919.1	PREDICTED: prothrombin-like [Salmo salar]	A0A1S3KUC3	A0A1S3KUC3_SALSA	unreviewed	Prothrombin (EC 3.4.21.5) (Coagulation factor II)	LOC106561958	Salmo salar (Atlantic salmon)	622	acute-phase response [GO:0006953]; blood coagulation [GO:0007596]	extracellular region [GO:0005576]	extracellular region [GO:0005576]; calcium ion binding [GO:0005509]; serine-type endopeptidase activity [GO:0004252]; acute-phase response [GO:0006953]; blood coagulation [GO:0007596]	calcium ion binding [GO:0005509]; serine-type endopeptidase activity [GO:0004252]	GO:0004252; GO:0005509; GO:0005576; GO:0006953; GO:0007596		sasa:106561958;	Peptidase S1 family			0.867639	0.845037	2	0.00359654	b,a,a	0.617878	15min and 30min	XP_005169022.1
XP_014004146.1	PREDICTED: scaffold attachment factor B2-like isoform X1 [Salmo salar]	A0A1S3MMV4	A0A1S3MMV4_SALSA	unreviewed	scaffold attachment factor B2-like isoform X1	LOC106573542	Salmo salar (Atlantic salmon)	841	regulation of mRNA processing [GO:0050684]; regulation of transcription, DNA-templated [GO:0006355]		RNA binding [GO:0003723]; regulation of mRNA processing [GO:0050684]; regulation of transcription, DNA-templated [GO:0006355]	RNA binding [GO:0003723]	GO:0003723; GO:0006355; GO:0050684		sasa:106573542;				-1.36334	-1.19029	3	0.0146541	b,a,a	-0.542806	15min and 30min	NP_999848.1
XP_014005218.1	Cluster of PREDICTED: profilin-2 [Salmo salar] (XP_014005218.1)	C0H9Y5	C0H9Y5_SALSA	unreviewed	Profilin	PROF2 pfn2	Salmo salar (Atlantic salmon)	139	actin cytoskeleton organization [GO:0030036]; regulation of actin filament polymerization [GO:0030833]		actin binding [GO:0003779]; actin cytoskeleton organization [GO:0030036]; regulation of actin filament polymerization [GO:0030833]	actin binding [GO:0003779]	GO:0003779; GO:0030036; GO:0030833		sasa:106574126;	Profilin family			0.871242	0.763913	2	0.0116241	b,a,a	0.524036	15min and 30min	XP_005171209.1
XP_014005791.1	PREDICTED: acyl-CoA-binding protein-like [Salmo salar]	B5X9H1	B5X9H1_SALSA	unreviewed	Acyl-CoA-binding protein (acyl-CoA-binding protein-like)	ACBP LOC106574430	Salmo salar (Atlantic salmon)	87			fatty-acyl-CoA binding [GO:0000062]	fatty-acyl-CoA binding [GO:0000062]	GO:0000062		sasa:106574430;				-0.73821	-1.02337	3	0.00372322	b,a,a	-0.687869	15min and 30min	NP_955902.1
XP_014007164.1	PREDICTED: acyl-CoA-binding protein-like [Salmo salar]	B5X5W4	B5X5W4_SALSA	unreviewed	Acyl-CoA-binding protein (acyl-CoA-binding protein-like)	ACBP LOC106575269	Salmo salar (Atlantic salmon)	99			fatty-acyl-CoA binding [GO:0000062]	fatty-acyl-CoA binding [GO:0000062]	GO:0000062		sasa:106575269;				0.726885	0.573843	2	0.00387236	b,a,a	0.518874	15min and 30min	NP_955902.1
XP_014008296.1	PREDICTED: serine-threonine kinase receptor-associated protein-like [Salmo salar]	A0A1S3MZX9	A0A1S3MZX9_SALSA	unreviewed	serine-threonine kinase receptor-associated protein-like	LOC106576022	Salmo salar (Atlantic salmon)	331			kinase activity [GO:0016301]	kinase activity [GO:0016301]	GO:0016301		sasa:106576022;				1.56138	1.51833	4	0.00105825	b,a,a	0.654445	15min and 30min	NP_956598.1
XP_014020009.1	PREDICTED: deoxyribonuclease-2-alpha-like isoform X1 [Salmo salar]	A0A1S3NXA0	A0A1S3NXA0_SALSA	unreviewed	Deoxyribonuclease II (EC 3.1.22.1)	LOC106581956	Salmo salar (Atlantic salmon)	417			deoxyribonuclease II activity [GO:0004531]	deoxyribonuclease II activity [GO:0004531]	GO:0004531		sasa:106581956;	DNase II family			1.97107	2.14031	4	0.00550607	b,a,a	0.653928	15min and 30min	NP_001108210.1
XP_014021584.1	Cluster of PREDICTED: rho-related GTP-binding protein RhoC [Salmo salar] (XP_014021584.1)	B5X229	B5X229_SALSA	unreviewed	Rho-related GTP-binding protein RhoC	RHOC LOC106582735	Salmo salar (Atlantic salmon)	193	skeletal muscle satellite cell migration [GO:1902766]; small GTPase mediated signal transduction [GO:0007264]; wound healing, spreading of cells [GO:0044319]		GTP binding [GO:0005525]; GTPase activity [GO:0003924]; skeletal muscle satellite cell migration [GO:1902766]; small GTPase mediated signal transduction [GO:0007264]; wound healing, spreading of cells [GO:0044319]	GTPase activity [GO:0003924]; GTP binding [GO:0005525]	GO:0003924; GO:0005525; GO:0007264; GO:0044319; GO:1902766		sasa:106582735;				0.613769	0.539841	2	0.0106576	b,a,a	0.533517	15min and 30min	NP_001002445.1
XP_014042524.1	PREDICTED: protein BUD31 homolog [Salmo salar]	A0A1S3QT07	A0A1S3QT07_SALSA	unreviewed	Protein BUD31 homolog	LOC106595689	Salmo salar (Atlantic salmon)	144		nucleus [GO:0005634]	nucleus [GO:0005634]		GO:0005634		sasa:106595689;	BUD31 (G10) family			2.53607	2.05916	4	6.13e-05	b,a,a	0.552767	15min and 30min	NP_001003860.1
XP_014050741.1	PREDICTED: fibrinogen gamma chain-like [Salmo salar]	A0A1S3RF10	A0A1S3RF10_SALSA	unreviewed	fibrinogen gamma chain-like	LOC106602564	Salmo salar (Atlantic salmon)	429	platelet activation [GO:0030168]; protein polymerization [GO:0051258]	fibrinogen complex [GO:0005577]	fibrinogen complex [GO:0005577]; signaling receptor binding [GO:0005102]; platelet activation [GO:0030168]; protein polymerization [GO:0051258]	signaling receptor binding [GO:0005102]	GO:0005102; GO:0005577; GO:0030168; GO:0051258		sasa:106602564;				1.42773	1.35689	4	0.00783428	b,a,a	0.572552	15min and 30min	NP_998219.1
XP_014053950.1	PREDICTED: plastin-3-like [Salmo salar]	A0A1S3RNQ5	A0A1S3RNQ5_SALSA	unreviewed	plastin-3-like	LOC106604087	Salmo salar (Atlantic salmon)	624	actin filament bundle assembly [GO:0051017]		actin filament binding [GO:0051015]; calcium ion binding [GO:0005509]; actin filament bundle assembly [GO:0051017]	actin filament binding [GO:0051015]; calcium ion binding [GO:0005509]	GO:0005509; GO:0051015; GO:0051017		sasa:106604087;				0.65986	0.65889	2	0.00671715	b,a,a	0.603677	15min and 30min	NP_001002326.1
XP_014071562.1	Cluster of PREDICTED: U6 snRNA-associated Sm-like protein LSm4 isoform X1 [Salmo salar] (XP_014071562.1)	B5XA57	B5XA57_SALSA	unreviewed	U6 snRNA-associated Sm-like protein LSm4	LSM4 LOC106613629	Salmo salar (Atlantic salmon)	147	mRNA splicing, via spliceosome [GO:0000398]; nuclear-transcribed mRNA catabolic process [GO:0000956]	spliceosomal complex [GO:0005681]	spliceosomal complex [GO:0005681]; RNA binding [GO:0003723]; mRNA splicing, via spliceosome [GO:0000398]; nuclear-transcribed mRNA catabolic process [GO:0000956]	RNA binding [GO:0003723]	GO:0000398; GO:0000956; GO:0003723; GO:0005681		sasa:106613629;	SnRNP Sm proteins family			1.29465	1.32326	4	0.00410135	b,a,a	0.634296	15min and 30min	NP_956990.1
NP_001117010.1	40S ribosomal protein S11 [Salmo salar]	Q9DF27	Q9DF27_SALSA	unreviewed	40S ribosomal protein S11	RS11 LOC106601127 rs11	Salmo salar (Atlantic salmon)	161	translation [GO:0006412]	cytosolic small ribosomal subunit [GO:0022627]	cytosolic small ribosomal subunit [GO:0022627]; structural constituent of ribosome [GO:0003735]; translation [GO:0006412]	structural constituent of ribosome [GO:0003735]	GO:0003735; GO:0006412; GO:0022627		sasa:100136373;sasa:106601127;	Universal ribosomal protein uS17 family			0.119386	0.766401	2	0.0233837	b,ab,a	0.575492	30min	NP_998542.1
NP_001117147.1	Cluster of Mx3 protein [Salmo salar] (NP_001117147.1)	Q98992	Q98992_SALSA	unreviewed	Mx3 protein	LOC100136587	Salmo salar (Atlantic salmon)	623	response to type I interferon [GO:0034340]	cell [GO:0005623]; extracellular space [GO:0005615]	cell [GO:0005623]; extracellular space [GO:0005615]; GTP binding [GO:0005525]; GTPase activity [GO:0003924]; response to type I interferon [GO:0034340]	GTPase activity [GO:0003924]; GTP binding [GO:0005525]	GO:0003924; GO:0005525; GO:0005615; GO:0005623; GO:0034340		sasa:100136587;	TRAFAC class dynamin-like GTPase superfamily, Dynamin/Fzo/YdjA family			-0.41347	-0.616685	1	0.0072333	b,ab,a	-0.673347	30min	NP_891987.2
NP_001117171.1	Cluster of beta-2-microglobulin precursor [Salmo salar] (NP_001117171.1)	Q9DD37	Q9DD37_SALSA	unreviewed	Beta-2-microglobulin	B2m b2m B2MG	Salmo salar (Atlantic salmon)	116	antigen processing and presentation of peptide antigen via MHC class I [GO:0002474]; innate immune response [GO:0045087]; response to virus [GO:0009615]	extracellular space [GO:0005615]; MHC class I protein complex [GO:0042612]	extracellular space [GO:0005615]; MHC class I protein complex [GO:0042612]; antigen processing and presentation of peptide antigen via MHC class I [GO:0002474]; innate immune response [GO:0045087]; response to virus [GO:0009615]		GO:0002474; GO:0005615; GO:0009615; GO:0042612; GO:0045087		sasa:100136933;	Beta-2-microglobulin family			-0.773114	-0.990877	3	0.0222965	b,ab,a	-0.588215	30min	NP_001153240.1
NP_001133172.1	eukaryotic translation initiation factor 3 subunit M [Salmo salar]	B5DGK2	B5DGK2_SALSA	unreviewed	Eukaryotic translation initiation factor 3 subunit M (eIF3m)	eif3m EIF3M	Salmo salar (Atlantic salmon)	375	formation of cytoplasmic translation initiation complex [GO:0001732]	eukaryotic 43S preinitiation complex [GO:0016282]; eukaryotic 48S preinitiation complex [GO:0033290]; eukaryotic translation initiation factor 3 complex, eIF3m [GO:0071541]	eukaryotic 43S preinitiation complex [GO:0016282]; eukaryotic 48S preinitiation complex [GO:0033290]; eukaryotic translation initiation factor 3 complex, eIF3m [GO:0071541]; translation initiation factor activity [GO:0003743]; formation of cytoplasmic translation initiation complex [GO:0001732]	translation initiation factor activity [GO:0003743]	GO:0001732; GO:0003743; GO:0016282; GO:0033290; GO:0071541		sasa:100194615;	EIF-3 subunit M family			0.786509	1.33337	4	0.0361653	b,ab,a	0.597826	30min	NP_001019906.1
NP_001133482.1	Cluster of T-complex protein 1 subunit delta [Salmo salar] (NP_001133482.1)	B5X1Z2	B5X1Z2_SALSA	unreviewed	T-complex protein 1 subunit delta	TCPD tcpd	Salmo salar (Atlantic salmon)	534	protein folding [GO:0006457]	cytoplasm [GO:0005737]	cytoplasm [GO:0005737]; ATP binding [GO:0005524]; unfolded protein binding [GO:0051082]; protein folding [GO:0006457]	ATP binding [GO:0005524]; unfolded protein binding [GO:0051082]	GO:0005524; GO:0005737; GO:0006457; GO:0051082		sasa:100194981;	TCP-1 chaperonin family			0.468126	0.664664	2	0.0118571	b,ab,a	0.657678	30min	NP_956877.1
NP_001133483.1	N-acetylgalactosamine kinase [Salmo salar]	B5X1Z3	B5X1Z3_SALSA	unreviewed	N-acetylgalactosamine kinase (EC 2.7.1.157)	GALK2 galk2	Salmo salar (Atlantic salmon)	459	galactose metabolic process [GO:0006012]	cytoplasm [GO:0005737]	cytoplasm [GO:0005737]; ATP binding [GO:0005524]; galactokinase activity [GO:0004335]; galactose binding [GO:0005534]; N-acetylgalactosamine kinase activity [GO:0033858]; galactose metabolic process [GO:0006012]	ATP binding [GO:0005524]; galactokinase activity [GO:0004335]; galactose binding [GO:0005534]; N-acetylgalactosamine kinase activity [GO:0033858]	GO:0004335; GO:0005524; GO:0005534; GO:0005737; GO:0006012; GO:0033858		sasa:100194982;	GHMP kinase family, GalK subfamily			0.813597	1.14868	4	0.0325759	b,ab,a	0.599463	30min	NP_001007433.2
NP_001133516.1	26S proteasome non-ATPase regulatory subunit 3 [Salmo salar]	B5DGU9	B5DGU9_SALSA	unreviewed	26S proteasome non-ATPase regulatory subunit 3 (26S proteasome non-ATPase regulatory subunit 3 isoform X1) (Proteasome (Prosome, macropain) 26S subunit, non ATPase, 3-1)	psd3 PSD3	Salmo salar (Atlantic salmon)	514	regulation of protein catabolic process [GO:0042176]	proteasome complex [GO:0000502]	proteasome complex [GO:0000502]; enzyme regulator activity [GO:0030234]; regulation of protein catabolic process [GO:0042176]	enzyme regulator activity [GO:0030234]	GO:0000502; GO:0030234; GO:0042176		sasa:100195015;	Proteasome subunit S3 family			0.90323	1.44143	4	0.0347985	b,ab,a	0.600762	30min	NP_956866.1
NP_001133604.1	Cluster of Twinfilin-1 [Salmo salar] (NP_001133604.1)	B5X2M7	B5X2M7_SALSA	unreviewed	Twinfilin-1	TWF1 twf1	Salmo salar (Atlantic salmon)	350	negative regulation of actin filament polymerization [GO:0030837]		actin binding [GO:0003779]; negative regulation of actin filament polymerization [GO:0030837]	actin binding [GO:0003779]	GO:0003779; GO:0030837		sasa:100195103;	Actin-binding proteins ADF family, Twinfilin subfamily			-0.137628	-0.662148	1	0.0493898	b,ab,a	-0.551774	30min	NP_001002304.1
NP_001134084.1	Cluster of Chromobox protein homolog 3 [Salmo salar] (NP_001134084.1)	B5X5R0	B5X5R0_SALSA	unreviewed	Chromobox protein homolog 3	CBX3 cbx3	Salmo salar (Atlantic salmon)	189	negative regulation of transcription, DNA-templated [GO:0045892]	nuclear euchromatin [GO:0005719]	nuclear euchromatin [GO:0005719]; negative regulation of transcription, DNA-templated [GO:0045892]		GO:0005719; GO:0045892		sasa:100195583;				-0.0763937	-0.452797	1	0.012653	a,a,b	-0.625976	30min	XP_005173826.1
NP_001134175.1	Acidic leucine-rich nuclear phosphoprotein 32 family member A [Salmo salar]	B5X6K3	B5X6K3_SALSA	unreviewed	Acidic leucine-rich nuclear phosphoprotein 32 family member A	AN32A an32a	Salmo salar (Atlantic salmon)	175							sasa:100195674;				0.222268	0.412206	2	0.00652539	b,ab,a	0.699116	30min	XP_005159922.1
NP_001134742.1	U1 small nuclear ribonucleoprotein A [Salmo salar]	B5XCU4	B5XCU4_SALSA	unreviewed	U1 small nuclear ribonucleoprotein A	SNRPA snrpa	Salmo salar (Atlantic salmon)	281			RNA binding [GO:0003723]	RNA binding [GO:0003723]	GO:0003723		sasa:100196241;	RRM U1 A/B'' family			-0.507464	-2.13023	3	0.00169507	a,a,b	-0.750221	30min	NP_955965.1
NP_001134971.1	Thioredoxin domain-containing protein 17 [Salmo salar]	B5XEH4	B5XEH4_SALSA	unreviewed	Thioredoxin domain-containing protein 17	TXD17 txd17	Salmo salar (Atlantic salmon)	123							sasa:100196470;				0.00947521	-0.860152	1	0.00628542	a,a,b	-0.602565	30min	NP_001003456.1
NP_001135049.1	calcyphosine-like [Salmo salar]	B5XGN9	B5XGN9_SALSA	unreviewed	Calcyphosin-like protein (calcyphosine-like) (calcyphosine-like isoform X1)	CAPSL capsl	Salmo salar (Atlantic salmon)	193			calcium ion binding [GO:0005509]	calcium ion binding [GO:0005509]	GO:0005509		sasa:100196548;				1.44526	1.75218	4	0.0127156	b,ab,a	0.64245	30min	XP_009297198.1
NP_001135106.1	Cluster of Beta-hexosaminidase beta chain precursor [Salmo salar] (NP_001135106.1)	B5X1T5	B5X1T5_SALSA	unreviewed	Beta-hexosaminidase (EC 3.2.1.52)	HEXB hexb	Salmo salar (Atlantic salmon)	545	carbohydrate metabolic process [GO:0005975]		beta-N-acetylhexosaminidase activity [GO:0004563]; N-acetyl-beta-D-galactosaminidase activity [GO:0102148]; carbohydrate metabolic process [GO:0005975]	beta-N-acetylhexosaminidase activity [GO:0004563]; N-acetyl-beta-D-galactosaminidase activity [GO:0102148]	GO:0004563; GO:0005975; GO:0102148		sasa:100196605;	Glycosyl hydrolase 20 family			0.0678833	-0.699307	1	0.0147603	a,a,b	-0.531607	30min	NP_001108317.1
NP_001135161.1	2-peptidylprolyl isomerase A [Salmo salar]	B5DG94	B5DG94_SALSA	unreviewed	Peptidyl-prolyl cis-trans isomerase (PPIase) (EC 5.2.1.8)	ppia1 PPIA	Salmo salar (Atlantic salmon)	164	protein folding [GO:0006457]		peptidyl-prolyl cis-trans isomerase activity [GO:0003755]; protein folding [GO:0006457]	peptidyl-prolyl cis-trans isomerase activity [GO:0003755]	GO:0003755; GO:0006457		sasa:100196660;	Cyclophilin-type PPIase family			0.139265	0.24638	2	0.0461599	b,ab,a	0.579252	30min	AAQ91263.1
NP_001232770.1	ribosomal protein L26 [Salmo salar]	B5DGV7	B5DGV7_SALSA	unreviewed	60S ribosomal protein L26 (ribosomal protein L26)	LOC100194649 LOC106612153 RL26 rl26	Salmo salar (Atlantic salmon)	145	translation [GO:0006412]	large ribosomal subunit [GO:0015934]	large ribosomal subunit [GO:0015934]; structural constituent of ribosome [GO:0003735]; translation [GO:0006412]	structural constituent of ribosome [GO:0003735]	GO:0003735; GO:0006412; GO:0015934		sasa:100194649;sasa:100195593;sasa:106612153;	Universal ribosomal protein uL24 family			0.0932189	0.868783	2	0.018116	a,a,b	0.579293	30min	NP_998278.1
XP_013979110.1	Cluster of PREDICTED: 60S ribosomal protein L36 [Salmo salar] (XP_013979110.1)	B5X5S9	B5X5S9_SALSA	unreviewed	60S ribosomal protein L36	RL36 LOC106560598	Salmo salar (Atlantic salmon)	105	translation [GO:0006412]	ribosome [GO:0005840]	ribosome [GO:0005840]; structural constituent of ribosome [GO:0003735]; translation [GO:0006412]	structural constituent of ribosome [GO:0003735]	GO:0003735; GO:0005840; GO:0006412		sasa:106560598;	Eukaryotic ribosomal protein eL36 family			0.421077	0.912655	2	0.0147741	b,ab,a	0.649886	30min	NP_998117.1
XP_013981535.1	PREDICTED: plakophilin-3 isoform X1 [Salmo salar]	A0A1S3KSG0	A0A1S3KSG0_SALSA	unreviewed	plakophilin-3 isoform X1	pkp3	Salmo salar (Atlantic salmon)	898	cell-cell adhesion [GO:0098609]	desmosome [GO:0030057]; nucleus [GO:0005634]	desmosome [GO:0030057]; nucleus [GO:0005634]; cell-cell adhesion [GO:0098609]		GO:0005634; GO:0030057; GO:0098609		sasa:106561813;	Beta-catenin family			-0.241562	-0.826765	1	0.0118877	b,ab,a	-0.658623	30min	NP_001038745.1
XP_013984226.1	Cluster of PREDICTED: ras-related protein Rab-14-like isoform X1 [Salmo salar] (XP_013984226.1)	A0A1S3KZT1	A0A1S3KZT1_SALSA	unreviewed	Ras-related protein Rab-14	LOC106563285	Salmo salar (Atlantic salmon)	216	defense response to bacterium [GO:0042742]; endocytic recycling [GO:0032456]; Golgi to endosome transport [GO:0006895]; phagosome maturation [GO:0090382]	cytosol [GO:0005829]; phagocytic vesicle [GO:0045335]; recycling endosome [GO:0055037]; trans-Golgi network [GO:0005802]	cytosol [GO:0005829]; phagocytic vesicle [GO:0045335]; recycling endosome [GO:0055037]; trans-Golgi network [GO:0005802]; GTP binding [GO:0005525]; GTPase activity [GO:0003924]; defense response to bacterium [GO:0042742]; endocytic recycling [GO:0032456]; Golgi to endosome transport [GO:0006895]; phagosome maturation [GO:0090382]	GTPase activity [GO:0003924]; GTP binding [GO:0005525]	GO:0003924; GO:0005525; GO:0005802; GO:0005829; GO:0006895; GO:0032456; GO:0042742; GO:0045335; GO:0055037; GO:0090382		sasa:106563285;	Small GTPase superfamily, Rab family			0.555261	0.839873	2	0.0428721	b,ab,a	0.582146	30min	NP_956977.2
XP_013984278.1	Cluster of PREDICTED: delta-aminolevulinic acid dehydratase-like [Salmo salar] (XP_013984278.1)	A0A1S3L040	A0A1S3L040_SALSA	unreviewed	Delta-aminolevulinic acid dehydratase (EC 4.2.1.24)	LOC106563307	Salmo salar (Atlantic salmon)	330	porphyrin-containing compound biosynthetic process [GO:0006779]		metal ion binding [GO:0046872]; porphobilinogen synthase activity [GO:0004655]; porphyrin-containing compound biosynthetic process [GO:0006779]	metal ion binding [GO:0046872]; porphobilinogen synthase activity [GO:0004655]	GO:0004655; GO:0006779; GO:0046872		sasa:106563307;	ALAD family		PATHWAY: Porphyrin-containing compound metabolism; protoporphyrin-IX biosynthesis; coproporphyrinogen-III from 5-aminolevulinate: step 1/4. {ECO:0000256|ARBA:ARBA00004694}.	0.768766	0.915662	2	0.0206793	b,ab,a	0.601715	30min	NP_001017645.1
XP_013985630.1	PREDICTED: cdc42-interacting protein 4 homolog, partial [Salmo salar]	A0A1S3L4A0	A0A1S3L4A0_SALSA	unreviewed	cdc42-interacting protein 4 homolog	LOC106564139	Salmo salar (Atlantic salmon)	363							sasa:106564139;				-0.57584	-1.55471	3	0.00343986	b,ab,a	-0.728426	30min	XP_017209563.1
XP_013987306.1	Cluster of PREDICTED: plasma membrane calcium-transporting ATPase 1-like isoform X1 [Salmo salar] (XP_013987306.1)	A0A1S3L8J7	A0A1S3L8J7_SALSA	unreviewed	Calcium-transporting ATPase (EC 7.2.2.10)	LOC106565103	Salmo salar (Atlantic salmon)	1197		integral component of membrane [GO:0016021]	integral component of membrane [GO:0016021]; ATP binding [GO:0005524]; calcium transmembrane transporter activity, phosphorylative mechanism [GO:0005388]	ATP binding [GO:0005524]; calcium transmembrane transporter activity, phosphorylative mechanism [GO:0005388]	GO:0005388; GO:0005524; GO:0016021		sasa:106565103;	Cation transport ATPase (P-type) (TC 3.A.3) family, Type IIB subfamily			-0.428898	-1.61643	3	0.00311727	b,ab,a	-0.725869	30min	ACB45514.1
XP_013990490.1	Cluster of PREDICTED: poly(rC)-binding protein 2-like isoform X2 [Salmo salar] (XP_013990490.1)	A0A1S3LI27	A0A1S3LI27_SALSA	unreviewed	poly(RC)-binding protein 2-like isoform X2	LOC106566707	Salmo salar (Atlantic salmon)	324			RNA binding [GO:0003723]	RNA binding [GO:0003723]	GO:0003723						-0.753169	-1.12108	3	0.0127035	b,ab,a	-0.63768	30min	NP_957486.1
XP_013996908.1	PREDICTED: serine/threonine-protein kinase OSR1-like [Salmo salar]	A0A1S3M131	A0A1S3M131_SALSA	unreviewed	Non-specific serine/threonine protein kinase (EC 2.7.11.1)	LOC106569807	Salmo salar (Atlantic salmon)	510	intracellular signal transduction [GO:0035556]		ATP binding [GO:0005524]; protein serine/threonine kinase activity [GO:0004674]; intracellular signal transduction [GO:0035556]	ATP binding [GO:0005524]; protein serine/threonine kinase activity [GO:0004674]	GO:0004674; GO:0005524; GO:0035556		sasa:106569807;				-0.312289	-0.621338	1	0.0211324	b,ab,a	-0.632748	30min	NP_001092217.1
XP_013997712.1	PREDICTED: type-4 ice-structuring protein-like [Salmo salar]	B5X6Y1	B5X6Y1_SALSA	unreviewed	Type-4 ice-structuring protein (type-4 ice-structuring protein-like)	AFP4 LOC106570190	Salmo salar (Atlantic salmon)	120							sasa:106570190;				-0.597237	-1.0269	3	0.00626233	b,ab,a	-0.688633	30min	NP_001038953.1
XP_014001445.1	PREDICTED: NSFL1 cofactor p47-like isoform X1 [Salmo salar]	A0A1S3MEF0	A0A1S3MEF0_SALSA	unreviewed	NSFL1 cofactor p47 (p97 cofactor p47)	LOC106572118	Salmo salar (Atlantic salmon)	377							sasa:106572118;				-0.149846	-1.13226	1	0.00053592	a,a,b	-0.747082	30min	XP_009295007.1
XP_014004038.1	PREDICTED: proteoglycan 4-like [Salmo salar]	A0A1S3MLP1	A0A1S3MLP1_SALSA	unreviewed	proteoglycan 4-like	LOC106573476	Salmo salar (Atlantic salmon)	289							sasa:106573476;				-0.424379	-0.699518	1	0.0212533	b,ab,a	-0.622751	30min	NP_001292504.1
XP_014005989.1	PREDICTED: ATP synthase subunit beta, mitochondrial [Salmo salar]	A0A1S3MVJ3	A0A1S3MVJ3_SALSA	unreviewed	ATP synthase subunit beta (EC 7.1.2.2)	LOC100196679 LOC106574550	Salmo salar (Atlantic salmon)	517	ATP synthesis coupled proton transport [GO:0015986]	proton-transporting ATP synthase complex, catalytic core F(1) [GO:0045261]	proton-transporting ATP synthase complex, catalytic core F(1) [GO:0045261]; ATP binding [GO:0005524]; proton-transporting ATP synthase activity, rotational mechanism [GO:0046933]; ATP synthesis coupled proton transport [GO:0015986]	ATP binding [GO:0005524]; proton-transporting ATP synthase activity, rotational mechanism [GO:0046933]	GO:0005524; GO:0015986; GO:0045261; GO:0046933		sasa:100196679;sasa:106574550;	ATPase alpha/beta chains family			0.232944	0.308031	2	0.0369573	b,ab,a	0.575461	30min	NP_001019600.2
XP_014010299.1	Cluster of PREDICTED: reticulon-4 isoform X5 [Salmo salar] (XP_014010299.1)	A0A1S3N4C3	A0A1S3N4C3_SALSA	unreviewed	Reticulon	rtn4	Salmo salar (Atlantic salmon)	349		endoplasmic reticulum membrane [GO:0005789]; integral component of membrane [GO:0016021]	endoplasmic reticulum membrane [GO:0005789]; integral component of membrane [GO:0016021]		GO:0005789; GO:0016021						0.173653	-0.954095	1	0.00941877	a,a,b	-0.510228	30min	NP_001073381.1
XP_014011982.1	PREDICTED: heterogeneous nuclear ribonucleoprotein C-like isoform X1 [Salmo salar]	B5X3G1	B5X3G1_SALSA	unreviewed	Heterogeneous nuclear ribonucleoproteins C1/C2 (heterogeneous nuclear ribonucleoprotein C-like isoform X1)	HNRPC LOC106577997	Salmo salar (Atlantic salmon)	307			RNA binding [GO:0003723]	RNA binding [GO:0003723]	GO:0003723		sasa:106577997;	RRM HNRPC family, RALY subfamily			-0.451925	-1.09721	3	0.0472316	b,ab,a	-0.57824	30min	XP_021333120.1
XP_014012275.1	Cluster of PREDICTED: fibrinogen beta chain-like [Salmo salar] (XP_014012275.1)	A0A1S3NAJ7	A0A1S3NAJ7_SALSA	unreviewed	Fibrinogen beta chain (Fibrinopeptide B)	LOC106578170	Salmo salar (Atlantic salmon)	486	platelet activation [GO:0030168]; protein polymerization [GO:0051258]	fibrinogen complex [GO:0005577]	fibrinogen complex [GO:0005577]; signaling receptor binding [GO:0005102]; platelet activation [GO:0030168]; protein polymerization [GO:0051258]	signaling receptor binding [GO:0005102]	GO:0005102; GO:0005577; GO:0030168; GO:0051258		sasa:106578170;				0.742879	1.1873	4	0.0177918	b,ab,a	0.644365	30min	NP_997939.1
XP_014012364.1	PREDICTED: profilin-2-like [Salmo salar]	B5X5I8	B5X5I8_SALSA	unreviewed	Profilin	PROF2 LOC106578240	Salmo salar (Atlantic salmon)	143	actin cytoskeleton organization [GO:0030036]; regulation of actin filament polymerization [GO:0030833]		actin binding [GO:0003779]; actin cytoskeleton organization [GO:0030036]; regulation of actin filament polymerization [GO:0030833]	actin binding [GO:0003779]	GO:0003779; GO:0030036; GO:0030833		sasa:106578240;	Profilin family			0.231641	0.313887	2	0.0140378	b,ab,a	0.638952	30min	NP_001292517.1
XP_014012402.1	Cluster of PREDICTED: SUMO-conjugating enzyme UBC9-B-like [Salmo salar] (XP_014012402.1)	B9EN11	B9EN11_SALSA	unreviewed	SUMO-conjugating enzyme UBC9 (SUMO-conjugating enzyme UBC9 isoform X2) (SUMO-conjugating enzyme UBC9-B) (SUMO-conjugating enzyme UBC9-B-like)	UBC9 LOC106578266 ubc9 UBC9B ube2i	Salmo salar (Atlantic salmon)	158			ATP binding [GO:0005524]; transferase activity [GO:0016740]	ATP binding [GO:0005524]; transferase activity [GO:0016740]	GO:0005524; GO:0016740		sasa:106578266;	Ubiquitin-conjugating enzyme family			-0.256896	-0.867715	1	0.0178429	b,ab,a	-0.636354	30min	NP_571908.1
XP_014014444.1	Cluster of PREDICTED: epidermal growth factor receptor kinase substrate 8-like protein 1 [Salmo salar] (XP_014014444.1)	A0A1S3NG64	A0A1S3NG64_SALSA	unreviewed	epidermal growth factor receptor kinase substrate 8-like protein 1	LOC106579243	Salmo salar (Atlantic salmon)	680			kinase activity [GO:0016301]	kinase activity [GO:0016301]	GO:0016301		sasa:106579243;	EPS8 family			-0.318165	-1.08979	1	0.025617	b,ab,a	-0.615155	30min	XP_005170855.1
XP_014014980.1	Cluster of PREDICTED: COP9 signalosome complex subunit 5 [Salmo salar] (XP_014014980.1)	B5DFV3	B5DFV3_SALSA	unreviewed	COP9 constitutive photomorphogenic homolog subunit 5 (COP9 signalosome complex subunit 5)	cops5 CSN5 LOC106579522	Salmo salar (Atlantic salmon)	334		COP9 signalosome [GO:0008180]	COP9 signalosome [GO:0008180]; metalloendopeptidase activity [GO:0004222]	metalloendopeptidase activity [GO:0004222]	GO:0004222; GO:0008180		sasa:106579522;	Peptidase M67A family, CSN5 subfamily			-0.199863	-2.01208	3	0.041258	b,ab,a	-0.550299	30min	NP_957019.1
XP_014015200.1	PREDICTED: programmed cell death protein 6-like [Salmo salar]	A0A1S3NIX5	A0A1S3NIX5_SALSA	unreviewed	programmed cell death protein 6-like	LOC106579627	Salmo salar (Atlantic salmon)	199			calcium ion binding [GO:0005509]	calcium ion binding [GO:0005509]	GO:0005509		sasa:106579627;				0.0305926	-1.08814	1	0.01315	a,a,b	-0.561904	30min	NP_957244.1
XP_014016163.1	PREDICTED: hibernation-specific plasma protein HP-55-like [Salmo salar]	A0A1S3NL72	A0A1S3NL72_SALSA	unreviewed	hibernation-specific plasma protein HP-55-like	LOC106580072	Salmo salar (Atlantic salmon)	438		extracellular space [GO:0005615]	extracellular space [GO:0005615]		GO:0005615		sasa:106580072;	Serpin family			-0.268153	-1.02227	1	0.0159755	b,ab,a	-0.639488	30min	NP_001104678.1
XP_014016754.1	Cluster of PREDICTED: S-adenosylmethionine synthase isoform type-2-like [Salmo salar] (XP_014016754.1)	A0A1S3NMY0	A0A1S3NMY0_SALSA	unreviewed	S-adenosylmethionine synthase (EC 2.5.1.6)	LOC106580346	Salmo salar (Atlantic salmon)	396	one-carbon metabolic process [GO:0006730]; S-adenosylmethionine biosynthetic process [GO:0006556]		ATP binding [GO:0005524]; metal ion binding [GO:0046872]; methionine adenosyltransferase activity [GO:0004478]; one-carbon metabolic process [GO:0006730]; S-adenosylmethionine biosynthetic process [GO:0006556]	ATP binding [GO:0005524]; metal ion binding [GO:0046872]; methionine adenosyltransferase activity [GO:0004478]	GO:0004478; GO:0005524; GO:0006556; GO:0006730; GO:0046872		sasa:106580346;	AdoMet synthase family		PATHWAY: Amino-acid biosynthesis; S-adenosyl-L-methionine biosynthesis; S-adenosyl-L-methionine from L-methionine: step 1/1. {ECO:0000256|ARBA:ARBA00005224, ECO:0000256|RuleBase:RU000541}.	1.16718	1.75626	4	0.00557311	b,ab,a	0.706425	30min	NP_001277009.1
XP_014017413.1	PREDICTED: 60S ribosomal protein L35a [Salmo salar]	C0H7D2	C0H7D2_SALSA	unreviewed	60S ribosomal protein L35a	RL35A LOC106580649 LOC106612432 rl35a	Salmo salar (Atlantic salmon)	110	translation [GO:0006412]	ribosome [GO:0005840]	ribosome [GO:0005840]; structural constituent of ribosome [GO:0003735]; translation [GO:0006412]	structural constituent of ribosome [GO:0003735]	GO:0003735; GO:0005840; GO:0006412		sasa:106580649;sasa:106612432;	Eukaryotic ribosomal protein eL33 family			2.34933	2.62759	4	0.0222179	b,ab,a	0.598111	30min	NP_001002487.1
XP_014017973.1	Cluster of PREDICTED: alpha-2-macroglobulin-like [Salmo salar] (XP_014017973.1)	A0A1S3NRC3	A0A1S3NRC3_SALSA	unreviewed	alpha-2-macroglobulin-like	LOC106580937	Salmo salar (Atlantic salmon)	1484		extracellular space [GO:0005615]	extracellular space [GO:0005615]; endopeptidase inhibitor activity [GO:0004866]	endopeptidase inhibitor activity [GO:0004866]	GO:0004866; GO:0005615		sasa:106580937;	Protease inhibitor I39 (alpha-2-macroglobulin) family			-0.675508	-2.21244	3	0.00221792	b,ab,a	-0.746245	30min	XP_009289860.1
XP_014018207.1	PREDICTED: septin-5-like isoform X1 [Salmo salar]	A0A1S3NS16	A0A1S3NS16_SALSA	unreviewed	septin-5-like isoform X1	LOC106581048	Salmo salar (Atlantic salmon)	572			GTP binding [GO:0005525]	GTP binding [GO:0005525]	GO:0005525		sasa:106581048;	TRAFAC class TrmE-Era-EngA-EngB-Septin-like GTPase superfamily, Septin GTPase family			0.801606	0.944296	2	0.0277999	b,ab,a	0.581498	30min	XP_021336990.1
XP_014020733.1	PREDICTED: large proline-rich protein BAG6 isoform X1 [Salmo salar]	A0A1S3NZD4	A0A1S3NZD4_SALSA	unreviewed	BCL2-associated athanogene 6	bag6	Salmo salar (Atlantic salmon)	1210							sasa:106582304;				-1.26036	-2.58289	3	0.00809059	b,ab,a	-0.670876	30min	NP_958445.1
XP_014023880.1	Cluster of PREDICTED: pyruvate dehydrogenase E1 component subunit beta, mitochondrial [Salmo salar] (XP_014023880.1)	A0A1S3P8E8	A0A1S3P8E8_SALSA	unreviewed	Pyruvate dehydrogenase E1 component subunit beta (EC 1.2.4.1)	pdhb	Salmo salar (Atlantic salmon)	388	acetyl-CoA biosynthetic process from pyruvate [GO:0006086]		pyruvate dehydrogenase (acetyl-transferring) activity [GO:0004739]; acetyl-CoA biosynthetic process from pyruvate [GO:0006086]	pyruvate dehydrogenase (acetyl-transferring) activity [GO:0004739]	GO:0004739; GO:0006086		sasa:106583814;				0.903217	1.48657	4	0.00881121	b,ab,a	0.683888	30min	NP_998319.1
XP_014024521.1	Cluster of PREDICTED: plasminogen activator inhibitor 1 RNA-binding protein-like isoform X1 [Salmo salar] (XP_014024521.1)	A0A1S3PAA0	A0A1S3PAA0_SALSA	unreviewed	plasminogen activator inhibitor 1 RNA-binding protein-like isoform X1	LOC106584137	Salmo salar (Atlantic salmon)	427			mRNA 3'-UTR binding [GO:0003730]	mRNA 3'-UTR binding [GO:0003730]	GO:0003730		sasa:106584137;				-0.0599842	-0.935582	1	0.000464425	a,a,b	-0.721889	30min	XP_009300781.1
XP_014024819.1	PREDICTED: peroxiredoxin-6-like isoform X2 [Salmo salar]	A0A1S3PBC6	A0A1S3PBC6_SALSA	unreviewed	peroxiredoxin-6-like isoform X2	LOC106584278	Salmo salar (Atlantic salmon)	222			peroxidase activity [GO:0004601]; peroxiredoxin activity [GO:0051920]	peroxidase activity [GO:0004601]; peroxiredoxin activity [GO:0051920]	GO:0004601; GO:0051920			Peroxiredoxin family			-0.00618518	-0.582164	1	0.0269185	a,a,b	-0.539009	30min	NP_957099.1
XP_014025441.1	Cluster of PREDICTED: dihydrolipoyl dehydrogenase, mitochondrial-like [Salmo salar] (XP_014025441.1)	A0A1S3PCX0	A0A1S3PCX0_SALSA	unreviewed	Dihydrolipoyl dehydrogenase (EC 1.8.1.4)	LOC106584548	Salmo salar (Atlantic salmon)	508	cell redox homeostasis [GO:0045454]		dihydrolipoyl dehydrogenase activity [GO:0004148]; flavin adenine dinucleotide binding [GO:0050660]; cell redox homeostasis [GO:0045454]	dihydrolipoyl dehydrogenase activity [GO:0004148]; flavin adenine dinucleotide binding [GO:0050660]	GO:0004148; GO:0045454; GO:0050660		sasa:106584548;	Class-I pyridine nucleotide-disulfide oxidoreductase family			-0.776931	-1.32082	3	0.0323123	b,ab,a	-0.591286	30min	AAQ91233.1
XP_014028378.1	PREDICTED: serum deprivation-response protein [Salmo salar]	A0A1S3PL20	A0A1S3PL20_SALSA	unreviewed	serum deprivation-response protein	sdpr	Salmo salar (Atlantic salmon)	480		caveola [GO:0005901]	caveola [GO:0005901]		GO:0005901		sasa:106586065;	CAVIN family			0.0204732	0.48365	2	0.0214764	a,a,b	0.557986	30min	NP_001263999.1
XP_014035789.1	PREDICTED: tryptase-like [Salmo salar]	A0A1S3Q8S2	A0A1S3Q8S2_SALSA	unreviewed	tryptase-like	LOC106589897	Salmo salar (Atlantic salmon)	368			serine-type endopeptidase activity [GO:0004252]	serine-type endopeptidase activity [GO:0004252]	GO:0004252		sasa:106589897;				0.501567	0.618621	2	0.018174	b,ab,a	0.612914	30min	XP_005164187.1
XP_014039385.1	PREDICTED: 60S ribosomal protein L27 [Salmo salar]	B5X8W7	B5X8W7_SALSA	unreviewed	60S ribosomal protein L27	RL17 LOC106592568 LOC106595614 LOC106595784 LOC106601555 LOC106606924	Salmo salar (Atlantic salmon)	136	translation [GO:0006412]	ribosome [GO:0005840]	ribosome [GO:0005840]; structural constituent of ribosome [GO:0003735]; translation [GO:0006412]	structural constituent of ribosome [GO:0003735]	GO:0003735; GO:0005840; GO:0006412		sasa:106592568;sasa:106595614;sasa:106595784;sasa:106601555;sasa:106606924;	Eukaryotic ribosomal protein eL27 family			1.40362	2.3452	4	0.0141024	b,ab,a	0.654295	30min	NP_956018.1
XP_014040204.1	Cluster of PREDICTED: polyadenylate-binding protein 1 [Salmo salar] (XP_014040204.1)	A0A1S3QLG9	A0A1S3QLG9_SALSA	unreviewed	Polyadenylate-binding protein (PABP)	LOC106593394	Salmo salar (Atlantic salmon)	630		cytoplasm [GO:0005737]	cytoplasm [GO:0005737]; RNA binding [GO:0003723]	RNA binding [GO:0003723]	GO:0003723; GO:0005737		sasa:106593394;	Polyadenylate-binding protein type-1 family			0.290748	0.442954	2	0.0298375	b,ab,a	0.605576	30min	XP_005169828.1
XP_014043591.1	PREDICTED: 3-hydroxyisobutyrate dehydrogenase, mitochondrial-like [Salmo salar]	A0A1S3QUL6	A0A1S3QUL6_SALSA	unreviewed	3-hydroxyisobutyrate dehydrogenase (HIBADH) (EC 1.1.1.31)	LOC106596865	Salmo salar (Atlantic salmon)	332	valine catabolic process [GO:0006574]		3-hydroxyisobutyrate dehydrogenase activity [GO:0008442]; NAD binding [GO:0051287]; NADP binding [GO:0050661]; valine catabolic process [GO:0006574]	3-hydroxyisobutyrate dehydrogenase activity [GO:0008442]; NAD binding [GO:0051287]; NADP binding [GO:0050661]	GO:0006574; GO:0008442; GO:0050661; GO:0051287		sasa:106596865;	HIBADH-related family		PATHWAY: Amino-acid degradation; L-valine degradation. {ECO:0000256|ARBA:ARBA00005109, ECO:0000256|RuleBase:RU910714}.	-0.812918	-1.73285	3	0.00784037	b,ab,a	-0.683881	30min	NP_957454.1
XP_014048385.1	Cluster of PREDICTED: cytolysin Src-1-like isoform X1 [Salmo salar] (XP_014048385.1)	A0A1S3R7P3	A0A1S3R7P3_SALSA	unreviewed	cytolysin Src-1-like isoform X1	LOC106601040	Salmo salar (Atlantic salmon)	176	cation transport [GO:0006812]; hemolysis in other organism involved in symbiotic interaction [GO:0052331]; pore complex assembly [GO:0046931]	pore complex [GO:0046930]	pore complex [GO:0046930]; channel activity [GO:0015267]; cation transport [GO:0006812]; hemolysis in other organism involved in symbiotic interaction [GO:0052331]; pore complex assembly [GO:0046931]	channel activity [GO:0015267]	GO:0006812; GO:0015267; GO:0046930; GO:0046931; GO:0052331		sasa:106601040;	Actinoporin family, Sea anemone subfamily			0.51293	0.662977	2	0.0298857	b,ab,a	0.590569	30min	XP_003198166.1
XP_014050350.1	Cluster of PREDICTED: ras GTPase-activating protein-binding protein 2-like isoform X3 [Salmo salar] (XP_014050350.1)	A0A1S3RE18	A0A1S3RE18_SALSA	unreviewed	ras GTPase-activating protein-binding protein 2-like isoform X3	LOC106602326 LOC106602321	Salmo salar (Atlantic salmon)	513	stress granule assembly [GO:0034063]		RNA binding [GO:0003723]; stress granule assembly [GO:0034063]	RNA binding [GO:0003723]	GO:0003723; GO:0034063						0.0337515	-0.882704	1	0.0233013	a,a,b	-0.529537	30min	NP_001074032.1
XP_014050371.1	Cluster of PREDICTED: general vesicular transport factor p115 [Salmo salar] (XP_014050371.1)	A0A1S3RE23	A0A1S3RE23_SALSA	unreviewed	General vesicular transport factor p115	uso1	Salmo salar (Atlantic salmon)	930	intracellular protein transport [GO:0006886]; vesicle fusion with Golgi apparatus [GO:0048280]	Golgi membrane [GO:0000139]	Golgi membrane [GO:0000139]; intracellular protein transport [GO:0006886]; vesicle fusion with Golgi apparatus [GO:0048280]		GO:0000139; GO:0006886; GO:0048280		sasa:106602327;	VDP/USO1/EDE1 family			-0.552365	-1.35768	3	0.00373809	b,ab,a	-0.724599	30min	NP_956449.1
XP_014050790.1	PREDICTED: clathrin light chain A-like isoform X1 [Salmo salar]	A0A1S3REP0	A0A1S3REP0_SALSA	unreviewed	Clathrin light chain	LOC106602594	Salmo salar (Atlantic salmon)	240	intracellular protein transport [GO:0006886]; vesicle-mediated transport [GO:0016192]	clathrin coat of coated pit [GO:0030132]; clathrin coat of trans-Golgi network vesicle [GO:0030130]	clathrin coat of coated pit [GO:0030132]; clathrin coat of trans-Golgi network vesicle [GO:0030130]; structural molecule activity [GO:0005198]; intracellular protein transport [GO:0006886]; vesicle-mediated transport [GO:0016192]	structural molecule activity [GO:0005198]	GO:0005198; GO:0006886; GO:0016192; GO:0030130; GO:0030132		sasa:106602594;	Clathrin light chain family			-0.242916	-1.44238	1	0.0170453	b,ab,a	-0.620941	30min	NP_998210.1
XP_014051906.1	PREDICTED: peroxiredoxin-5, mitochondrial-like [Salmo salar]	A0A1S3RI85	A0A1S3RI85_SALSA	unreviewed	Peroxiredoxin-5 (EC 1.11.1.24)	LOC106603145	Salmo salar (Atlantic salmon)	190	cell redox homeostasis [GO:0045454]		peroxidase activity [GO:0004601]; peroxiredoxin activity [GO:0051920]; cell redox homeostasis [GO:0045454]	peroxidase activity [GO:0004601]; peroxiredoxin activity [GO:0051920]	GO:0004601; GO:0045454; GO:0051920		sasa:106603145;	Peroxiredoxin family, Prx5 subfamily			-0.15013	-2.15244	3	0.00248909	a,a,b	-0.681537	30min	NP_001019577.1
XP_014055574.1	PREDICTED: casein kinase I isoform alpha isoform X6 [Salmo salar]	A0A1S3RV14	A0A1S3RV14_SALSA	unreviewed	casein kinase I isoform alpha isoform X6	LOC106604944	Salmo salar (Atlantic salmon)	350			ATP binding [GO:0005524]; protein serine/threonine kinase activity [GO:0004674]	ATP binding [GO:0005524]; protein serine/threonine kinase activity [GO:0004674]	GO:0004674; GO:0005524			Protein kinase superfamily			1.55206	3.14005	4	0.0221619	b,ab,a	0.605799	30min	XP_009289365.1
XP_014057902.1	Cluster of PREDICTED: brain-specific angiogenesis inhibitor 1-associated protein 2-like isoform X1 [Salmo salar] (XP_014057902.1)	A0A1S3S0W9	A0A1S3S0W9_SALSA	unreviewed	Brain-specific angiogenesis inhibitor 1-associated protein 2	LOC106606286	Salmo salar (Atlantic salmon)	577	plasma membrane organization [GO:0007009]; regulation of actin cytoskeleton organization [GO:0032956]		cytoskeletal anchor activity [GO:0008093]; plasma membrane organization [GO:0007009]; regulation of actin cytoskeleton organization [GO:0032956]	cytoskeletal anchor activity [GO:0008093]	GO:0007009; GO:0008093; GO:0032956		sasa:106606286;				0.246252	-0.934335	1	0.00607464	a,a,b	-0.489856	30min	XP_021327004.1
XP_014058994.1	Cluster of PREDICTED: phosphoribosyl pyrophosphate synthase-associated protein 1 isoform X1 [Salmo salar] (XP_014058994.1)	A0A1S3S428	A0A1S3S428_SALSA	unreviewed	phosphoribosyl pyrophosphate synthase-associated protein 1 isoform X1	LOC106606986	Salmo salar (Atlantic salmon)	371	nucleoside metabolic process [GO:0009116]; nucleotide biosynthetic process [GO:0009165]		magnesium ion binding [GO:0000287]; ribose phosphate diphosphokinase activity [GO:0004749]; nucleoside metabolic process [GO:0009116]; nucleotide biosynthetic process [GO:0009165]	magnesium ion binding [GO:0000287]; ribose phosphate diphosphokinase activity [GO:0004749]	GO:0000287; GO:0004749; GO:0009116; GO:0009165		sasa:106606986;	Ribose-phosphate pyrophosphokinase family			1.0171	1.59497	4	0.00900797	b,ab,a	0.682854	30min	NP_001002199.1
XP_014059279.1	PREDICTED: ran GTPase-activating protein 1-like isoform X1 [Salmo salar]	A0A1S3S4I6	A0A1S3S4I6_SALSA	unreviewed	ran GTPase-activating protein 1-like isoform X1	LOC106607164	Salmo salar (Atlantic salmon)	564	signal transduction [GO:0007165]		GTPase activator activity [GO:0005096]; signal transduction [GO:0007165]	GTPase activator activity [GO:0005096]	GO:0005096; GO:0007165		sasa:106607164;				-0.66236	-1.66585	3	0.0243933	b,ab,a	-0.624317	30min	NP_001070084.1
XP_014061132.1	PREDICTED: low molecular weight phosphotyrosine protein phosphatase isoform X2 [Salmo salar]	A0A1S3S9W3	A0A1S3S9W3_SALSA	unreviewed	Low molecular weight cytosolic acid phosphatase (EC 3.1.3.2) (EC 3.1.3.48) (Low molecular weight phosphotyrosine protein phosphatase)	acp1	Salmo salar (Atlantic salmon)	158		cytoplasm [GO:0005737]	cytoplasm [GO:0005737]; acid phosphatase activity [GO:0003993]; non-membrane spanning protein tyrosine phosphatase activity [GO:0004726]	acid phosphatase activity [GO:0003993]; non-membrane spanning protein tyrosine phosphatase activity [GO:0004726]	GO:0003993; GO:0004726; GO:0005737			Low molecular weight phosphotyrosine protein phosphatase family			0.796211	1.35799	4	0.0474077	b,ab,a	0.577644	30min	NP_001014324.2
XP_014061255.1	PREDICTED: peptidyl-prolyl cis-trans isomerase FKBP3-like [Salmo salar]	A0A1S3SA94	A0A1S3SA94_SALSA	unreviewed	Peptidylprolyl isomerase (EC 5.2.1.8)	LOC106608082	Salmo salar (Atlantic salmon)	220			peptidyl-prolyl cis-trans isomerase activity [GO:0003755]	peptidyl-prolyl cis-trans isomerase activity [GO:0003755]	GO:0003755		sasa:106608082;				-0.0235748	-1.00199	1	0.0321884	b,ab,a	-0.533457	30min	NP_001071238.1
XP_014061531.1	Cluster of PREDICTED: 26S protease regulatory subunit 4-like [Salmo salar] (XP_014061531.1)	C0HAC7	C0HAC7_SALSA	unreviewed	26S protease regulatory subunit 4 (26S protease regulatory subunit 4-like)	PRS4 LOC106608224	Salmo salar (Atlantic salmon)	440	protein catabolic process [GO:0030163]	cytoplasm [GO:0005737]	cytoplasm [GO:0005737]; ATP binding [GO:0005524]; peptidase activity [GO:0008233]; proteasome-activating ATPase activity [GO:0036402]; protein catabolic process [GO:0030163]	ATP binding [GO:0005524]; peptidase activity [GO:0008233]; proteasome-activating ATPase activity [GO:0036402]	GO:0005524; GO:0005737; GO:0008233; GO:0030163; GO:0036402		sasa:106608224;	AAA ATPase family			0.0153024	-0.565705	1	0.0265854	a,a,b	-0.527409	30min	NP_001002091.1
XP_014063771.1	Cluster of PREDICTED: methionine aminopeptidase 2 isoform X1 [Salmo salar] (XP_014063771.1)	B5X2F4	B5X2F4_SALSA	unreviewed	Methionine aminopeptidase 2 (MAP 2) (MetAP 2) (EC 3.4.11.18) (Initiation factor 2-associated 67 kDa glycoprotein) (Peptidase M) (p67) (p67eIF2)	AMPM2 LOC100194705 METAP2	Salmo salar (Atlantic salmon)	477	protein initiator methionine removal [GO:0070084]	cytoplasm [GO:0005737]	cytoplasm [GO:0005737]; metal ion binding [GO:0046872]; metalloaminopeptidase activity [GO:0070006]; protein initiator methionine removal [GO:0070084]	metal ion binding [GO:0046872]; metalloaminopeptidase activity [GO:0070006]	GO:0005737; GO:0046872; GO:0070006; GO:0070084		sasa:100194705;	Peptidase M24A family, Methionine aminopeptidase eukaryotic type 2 subfamily			-0.0614046	-2.72046	3	0.0153364	a,a,b	-0.579657	30min	NP_955934.1
XP_014065433.1	PREDICTED: thioredoxin-like [Salmo salar]	A0A1S3SM64	A0A1S3SM64_SALSA	unreviewed	Thioredoxin	LOC106610576	Salmo salar (Atlantic salmon)	105	cell redox homeostasis [GO:0045454]; glycerol ether metabolic process [GO:0006662]		protein disulfide oxidoreductase activity [GO:0015035]; cell redox homeostasis [GO:0045454]; glycerol ether metabolic process [GO:0006662]	protein disulfide oxidoreductase activity [GO:0015035]	GO:0006662; GO:0015035; GO:0045454		sasa:106610576;	Thioredoxin family			0.764867	0.906231	2	0.0463681	b,ab,a	0.547752	30min	NP_956317.1
XP_014068396.1	Cluster of PREDICTED: neutral alpha-glucosidase AB-like isoform X1 [Salmo salar] (XP_014068396.1)	A0A1S3SVN0	A0A1S3SVN0_SALSA	unreviewed	neutral alpha-glucosidase AB-like isoform X1	LOC106612084	Salmo salar (Atlantic salmon)	937	carbohydrate metabolic process [GO:0005975]		carbohydrate binding [GO:0030246]; hydrolase activity, hydrolyzing O-glycosyl compounds [GO:0004553]; carbohydrate metabolic process [GO:0005975]	carbohydrate binding [GO:0030246]; hydrolase activity, hydrolyzing O-glycosyl compounds [GO:0004553]	GO:0004553; GO:0005975; GO:0030246		sasa:106612084;	Glycosyl hydrolase 31 family			2.33331	2.93884	4	0.0401794	b,ab,a	0.58604	30min	XP_009289535.1
XP_014068837.1	PREDICTED: SH3 domain-binding glutamic acid-rich-like protein [Salmo salar]	B9EPE7	B9EPE7_SALSA	unreviewed	SH3 domain-binding glutamic acid-rich-like protein	SH3L1 LOC106612317	Salmo salar (Atlantic salmon)	115							sasa:106612317;	SH3BGR family			0.297274	0.755366	2	0.0219912	b,ab,a	0.62008	30min	NP_957503.1
XP_014069132.1	Cluster of PREDICTED: coatomer subunit delta [Salmo salar] (XP_014069132.1)	A0A1S3SXR5	A0A1S3SXR5_SALSA	unreviewed	Coatomer subunit delta	arcn1	Salmo salar (Atlantic salmon)	510	protein transport [GO:0015031]; retrograde vesicle-mediated transport, Golgi to endoplasmic reticulum [GO:0006890]	COPI vesicle coat [GO:0030126]; Golgi membrane [GO:0000139]	COPI vesicle coat [GO:0030126]; Golgi membrane [GO:0000139]; protein transport [GO:0015031]; retrograde vesicle-mediated transport, Golgi to endoplasmic reticulum [GO:0006890]		GO:0000139; GO:0006890; GO:0015031; GO:0030126		sasa:106612481;	Adaptor complexes medium subunit family, Delta-COP subfamily			0.982299	1.49233	4	0.00628486	b,ab,a	0.700273	30min	NP_973722.1
XP_014069145.1	PREDICTED: calpain-8-like [Salmo salar]	A0A1S3SXT2	A0A1S3SXT2_SALSA	unreviewed	calpain-8-like	LOC106612489	Salmo salar (Atlantic salmon)	704			calcium ion binding [GO:0005509]; calcium-dependent cysteine-type endopeptidase activity [GO:0004198]	calcium-dependent cysteine-type endopeptidase activity [GO:0004198]; calcium ion binding [GO:0005509]	GO:0004198; GO:0005509		sasa:106612489;	Peptidase C2 family			0.563269	0.877144	2	0.00536165	b,ab,a	0.706155	30min	XP_005173727.1
